# Supplementary material for: Impacts of no-tillage management on nitrate loss from corn, soybean and wheat cultivation: A meta-analysis
Source: PubMed Central journal article supplement (PMC5608951; doi:10.1038/s41598-017-12383-7), 2017-09-21
Supplement: 41598_2017_12383_MOESM1_ESM.pdf [file 41598_2017_12383_MOESM1_ESM.pdf]

**Impacts of no-tillage management on nitrate loss from corn, soybean and wheat cultivation:  
A meta-analysis**

**Stefani Daryanto<sup>1</sup>, Lixin Wang<sup>1\*</sup>, Pierre-André Jacinthe<sup>1</sup>**

<sup>1</sup>Department of Earth Sciences, 723 West Michigan St, SL118, Indiana University Purdue  
University Indianapolis, Indianapolis, IN 46202, USA

\*Corresponding Author: Lixin Wang ([lxwang@iupui.edu](mailto:lxwang@iupui.edu))

## Supplementary Figures

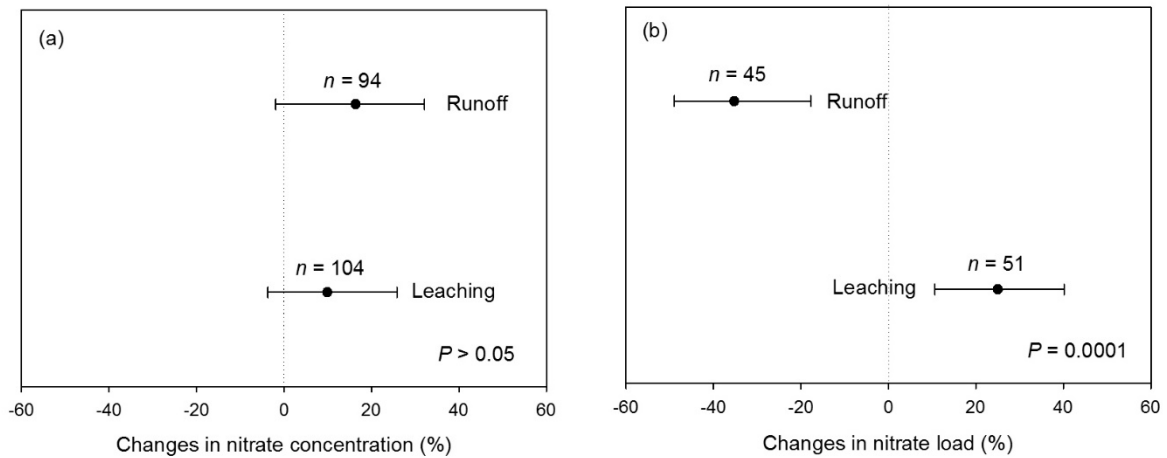

Fig. S1. The overall percentage change in the concentration (a) and load (b) of nitrate with no-till (NT) in comparison to conventional tillage (CT) from soils without artificial drainage. Black dots represent the mean of  $\ln R$  with error bar representing the 95% confidence interval (CI). A negative value indicates a reduction due to NT adoption in comparison to CT, which is only statistically significant when the CI does not overlap zero. Letter 'n' indicates the number of samples, P values indicate statistical difference between leaching and runoff.

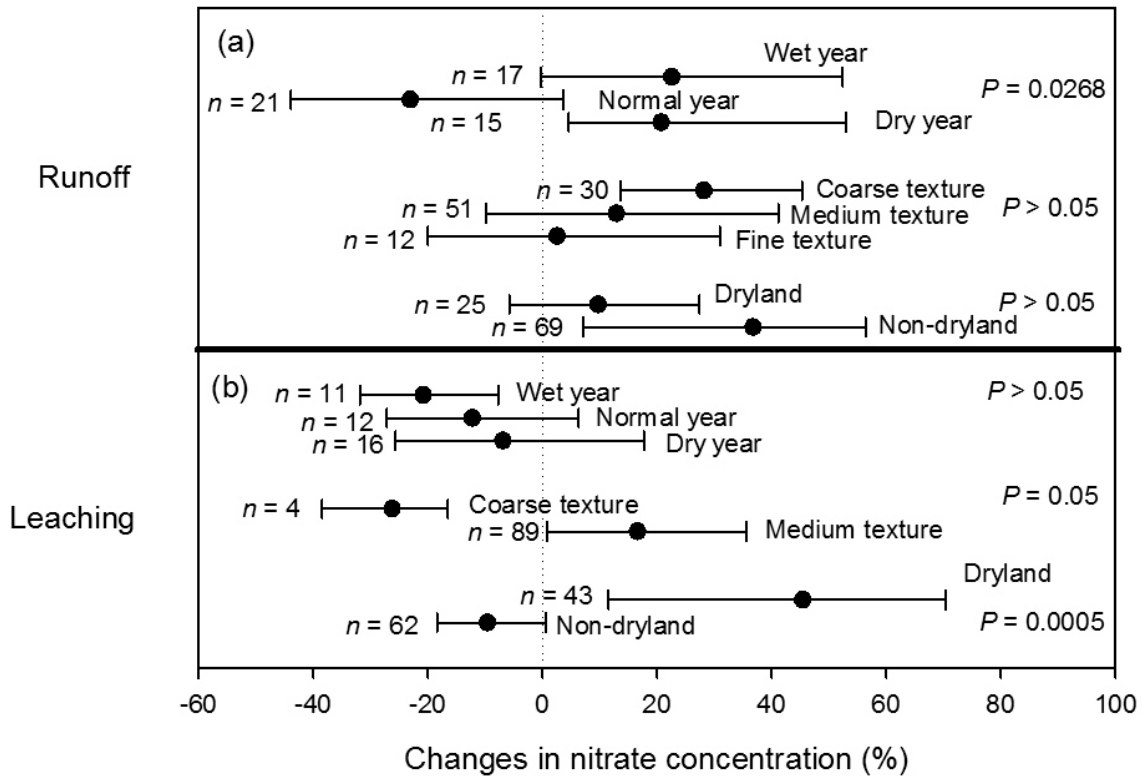

Fig. S2. Percentage changes in the concentration of nitrate through runoff (a) and leaching (b) and their interactions with different physical variables from soils without artificial drainage. Black dots represent the mean of  $\ln R$  with error bar representing the 95% confidence interval (CI). A negative value indicates a reduction due to NT adoption in comparison to CT, which is only statistically significant when the CI does not overlap zero. Letter 'n' indicates the number of sample,  $P$  values indicate difference within each physical variables.

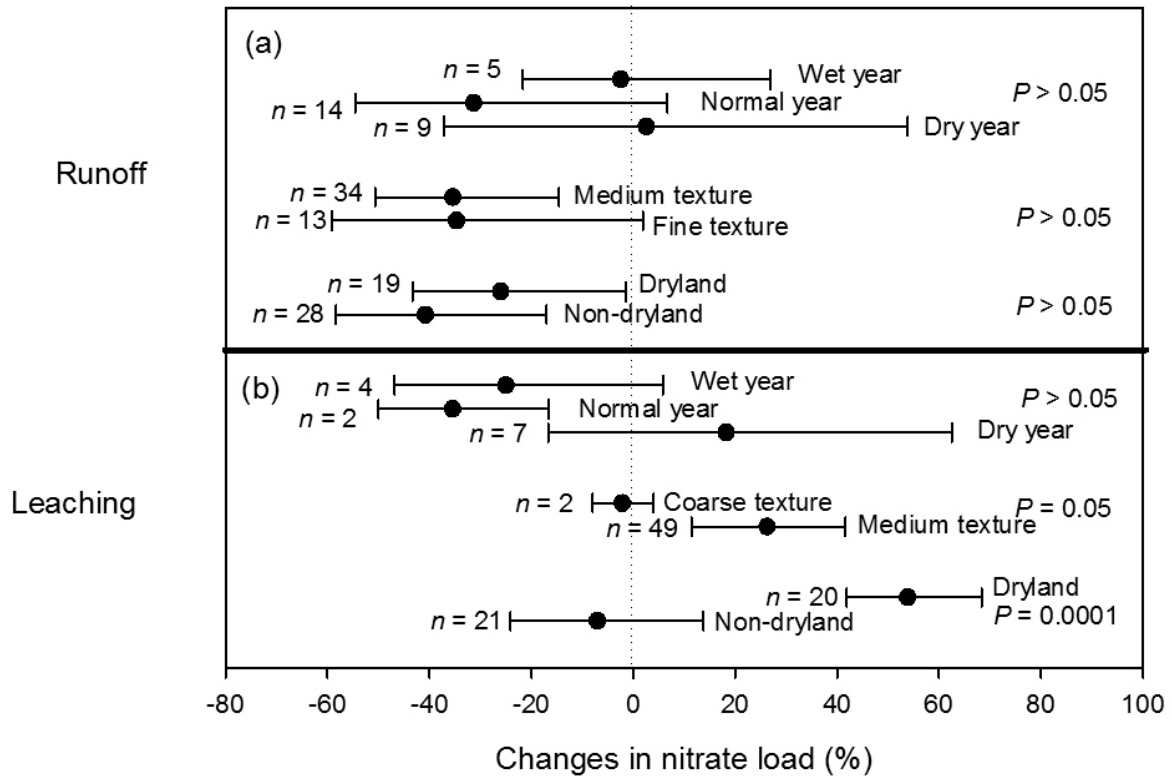

Fig. S3. Percentage changes in the load of nitrate through runoff (a) and leaching (b) and their interactions with different physical variables from soils without artificial drainage. Black dots represent the mean of  $\ln R$  with error bar representing the 95% confidence interval (CI). A negative value indicates a reduction due to NT adoption in comparison to CT, which is only statistically significant when the CI does not overlap zero. Letter 'n' indicates the number of sample,  $P$  values indicate difference within each physical variables.

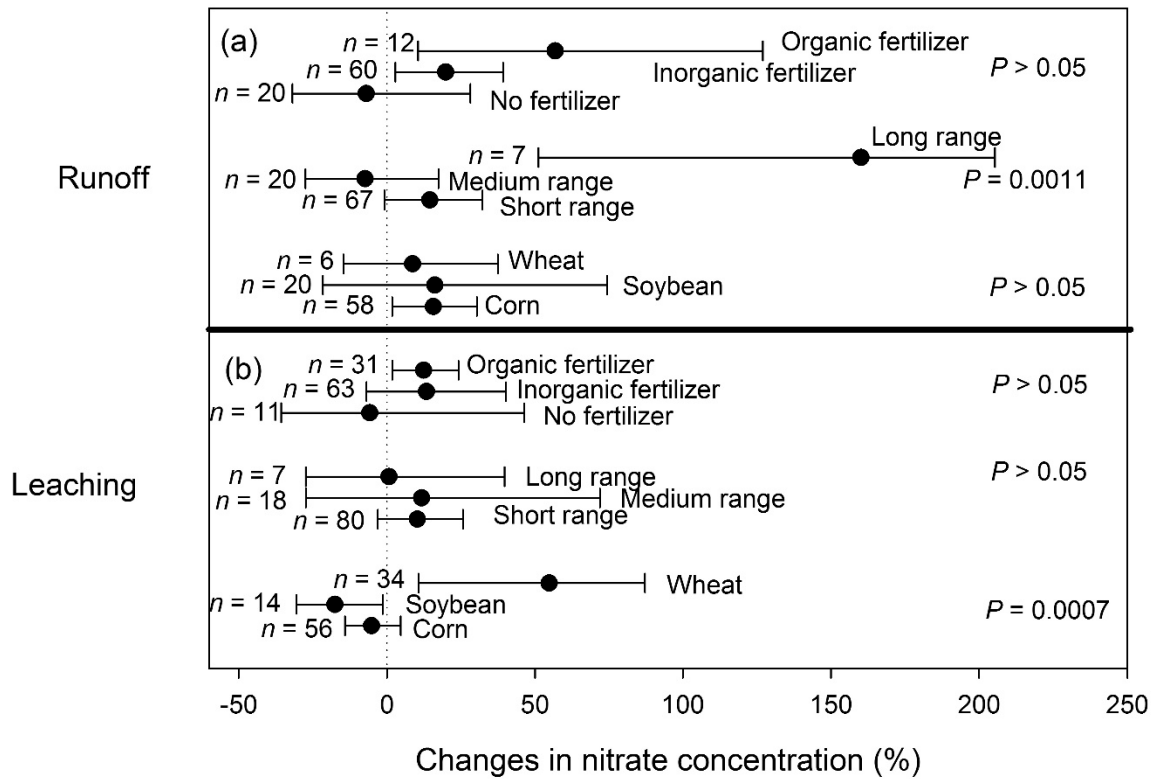

Fig. S4. Percentage changes in the concentration of nitrate through runoff (a) and leaching (b) and their interactions with different management variables from soils without artificial drainage. Black dots represent the mean of  $\ln R$  with error bar representing the 95% confidence interval (CI). A negative value indicates a reduction due to NT adoption in comparison to CT, which is only statistically significant when the CI does not overlap zero. Letter 'n' indicates the number of sample,  $P$  values indicate difference within each management variables.

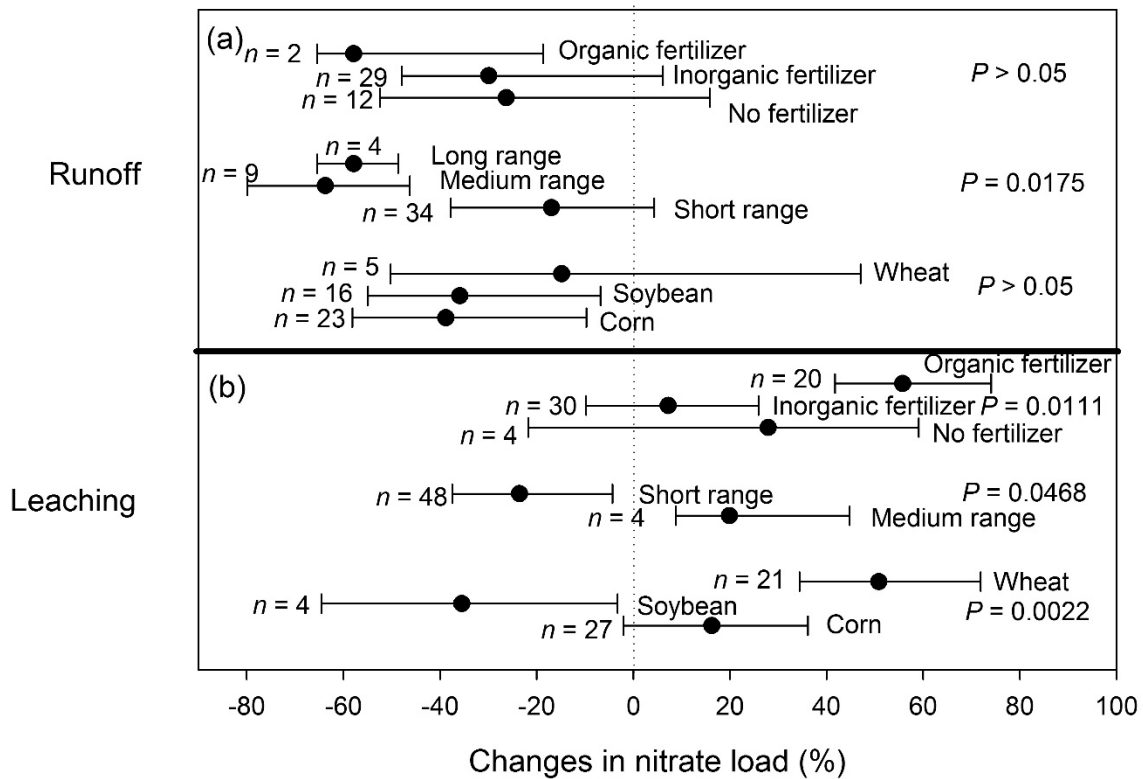

Fig. S5. Percentage changes in the load of nitrate through runoff (a) and leaching (b) and their interactions with different management variables from soils without artificial drainage. Black dots represent the mean of  $\ln R$  with error bar representing the 95% confidence interval (CI). A negative value indicates a reduction due to NT adoption in comparison to CT, which is only statistically significant when the CI does not overlap zero. Letter 'n' indicates the number of sample,  $P$  values indicate difference within each management variables.

Supplementary Table S1. List of publications used to collect the database for this study

| Author and year of publication  | Article Title and Journal name                                                                                                                                         | Nitrate concentration | Nitrate load |
|---------------------------------|------------------------------------------------------------------------------------------------------------------------------------------------------------------------|-----------------------|--------------|
| Al-Kaisi and Licht, 2004        | Effect of strip tillage on corn nitrogen uptake and residual soil nitrate accumulation compared with no-tillage and chisel plow. <i>Agronomy Journal</i> 96, 1164-1171 | X*                    |              |
| Bakhsh and Kanwar, 2001         | Simulating tillage effects on non-point source pollution from agricultural lands using GLEAMS. <i>Transactions of the ASAE</i> 44, 891-898                             | X                     | X            |
| Bakhsh et al., 2002             | Cropping system effects on NO <sub>3</sub> -N loss with subsurface drainage water. <i>Transactions of the ASAE</i> 45, 1789-1797                                       | X                     | X            |
| Bakhsh and Kanwar, 2007         | Tillage and N application rates affect on corn and soybean yields and NO <sub>3</sub> -N leaching losses. <i>Transactions of the ASABE</i> 50, 1189-1198               | X                     | X            |
| Bjorneberg et al., 1996         | Seasonal changes in flow and nitrate-N loss from subsurface drains. <i>Transactions of the ASAE</i> 39, 961-976                                                        | X                     | X            |
| Blevins et al., 1990            | Tillage effects on sediment and soluble nutrient losses from a maury silt loam soil. <i>Journal of Environmental Quality</i> 19, 683-686                               |                       | X            |
| Brye et al., 2001               | Nitrogen and carbon leaching in agroecosystems and their role in denitrification potential. <i>Journal of Environmental Quality</i> 30, 1822-1828                      | X                     | X            |
| Brye and Norman, 2004           | Land-use effects on anion-associated cation leaching in response to above normal precipitation. <i>Acta Hydrochimica et Hydrobiologica</i> 32, 235-248                 | X                     | X            |
| Chichester and Richardson, 1992 | Sediment and nutrient loss from clay soils as affected by tillage. <i>Journal of Environmental Quality</i> 21, 587-590                                                 |                       | X            |

|                          |                                                                                                                                                                 |   |   |
|--------------------------|-----------------------------------------------------------------------------------------------------------------------------------------------------------------|---|---|
| Drury et al., 1993       | Influence of tillage on nitrate loss in surface runoff and tile drainage. Soil Science Society of American Journal 57, 797-802                                  | X | X |
| Eghball and Gilley, 1999 | Phosphorus and nitrogen in runoff following beef cattle manure or compost application. Journal of Environmental Quality 28, 1201-1210                           | X |   |
| Eghball et al., 2000     | Narrow grass hedge effects on phosphorus and nitrogen in runoff following manure and fertilizer application. Journal of Soil and Water Conservation 55, 172-176 | X | X |
| Fraser et al., 2013      | Winter nitrate leaching under different tillage and winter cover crop management practices. Soil Science Society of American Journal 77, 1391-1401              | X |   |
| Fuller et al., 2010      | Seasonal and crop rotational effects of manure management on nitrate-nitrogen leaching in Nova Scotia. Agriculture, Ecosystems and Environment 137, 267-275     | X | X |
| Gerakis et al., 2006     | Simulation of leaching losses in the nitrogen cycle. Communications in Soil Science and Plant Analysis 37, 1973-1997                                            |   | X |
| Gilley et al., 2007      | Nutrient concentrations of runoff during the year following manure application. Transactions of the ASABE 50, 1987-1999                                         | X |   |
| Gilley et al., 2007b     | Nitrogen and phosphorus concentrations of runoff as affected by moldboard plowing. Transactions of the ASABE 50, 1543-1548                                      | X |   |
| Gilley et al., 2010      | Nutrient transport in runoff as affected by diet, tillage and manure application rate. Transactions of the ASABE 53, 1895-1902                                  |   | X |
| Huang et al., 2015       | No-tillage and fertilization management on crop yields and nitrate leaching in North China Plain. Ecology and Evolution 5, 1143-1155                            | X | X |



|                         |                                                                                                                                                                                                                      |   |   |
|-------------------------|----------------------------------------------------------------------------------------------------------------------------------------------------------------------------------------------------------------------|---|---|
| Joshi et al., 1994      | Long-term conservation tillage and liquid dairy manure effects on corn. II. Nitrate concentration in soil water. <i>Soil and Tillage Research</i> 31, 225-233                                                        | X |   |
| Kanwar et al., 1997     | Ridge, moldboard, chisel, and no-till effects on tile water quality beneath two cropping systems. <i>Journal of Production Agriculture</i> 10, 227-234                                                               | X | X |
| Lal et al., 1997        | Soil degradative effects of slope length and tillage methods on alfisols in western Nigeria. II. Soil chemical properties, plant nutrient loss and water quality. <i>Land Degradation and Development</i> 8, 221-244 | X |   |
| Logan et al., 1994      | Tillage, crop and climatic effects on runoff and tile drainage losses of nitrate and four herbicides. <i>Soil and Tillage Research</i> 30, 75-103                                                                    | X | X |
| Meek et al., 1995       | Nitrate leaching under furrow irrigation as affected by crop sequence and tillage. <i>Soil Science Society of American Journal</i> 59, 204-210                                                                       | X |   |
| Meisinger et al., 2015  | Effects of tillage practices on drainage and nitrate leaching from winter wheat in the Northern Atlantic Coastal-Plain USA. <i>Soil and Tillage Research</i> 151, 18-27                                              | X | X |
| Mkhabela et al., 2008   | Gaseous and leaching nitrogen losses from no-tillage and conventional tillage systems following surface application of cattle manure. <i>Soil and Tillage Research</i> 98, 187-199                                   | X | X |
| Mostaghimi et al., 1992 | Crop residue effects on nitrogen yield in water and sediment runoff from two tillage systems. <i>Agriculture, Ecosystems and Environment</i> 39, 187-196                                                             | X |   |
| Owens and Edwards, 1993 | Tillage studies with a corn-soybean rotation: Surface runoff chemistry. <i>Soil Science Society of American Journal</i> 57, 1055-1060                                                                                | X | X |

|                               |                                                                                                                                                                                                    |   |   |
|-------------------------------|----------------------------------------------------------------------------------------------------------------------------------------------------------------------------------------------------|---|---|
| Patni et al., 1996            | Tile effluent quality and chemical losses under conventional and no tillage .1. Flow and nitrate. Transactions of the ASAE 39, 1665-1672                                                           | X | X |
| Patni et al., 1998            | Groundwater quality under conventional and no tillage: I. Nitrate, electrical conductivity, and pH. Journal of Environmental Quality 27, 869-877                                                   | X | X |
| Randall and Iragavarapu, 1995 | Impact of long-term tillage systems for continuous corn on nitrate leaching to tile drainage. Journal of Environmental Quality 24, 360-366                                                         | X | X |
| Rasse and Smucker, 1999       | Tillage effects on soil nitrogen and plant biomass in a corn-alfalfa rotation. Journal of Environmental Quality 28, 873-880                                                                        | X | X |
| Richardson and King, 1995     | Erosion and nutrient losses from zero tillage on a clay soil. Journal of Agricultural Engineering Research 61, 81-86                                                                               |   | X |
| Ritter et al., 1993           | Nitrate leaching under irrigated corn. Journal of Irrigation and Drainage Engineering 119, 544-553                                                                                                 | X | X |
| Schreiber and Cullum, 1998    | Tillage effects on surface and groundwater quality in loessial upland soybeanwatersheds. Transactions of the ASAE 41, 607-614                                                                      | X |   |
| Seta et al., 1993             | Reducing soil erosion and agricultural chemical losses with conservation tillage. Journal of Environmental Quality 22, 661-665                                                                     | X | X |
| Sharpley and Smith, 1994      | Wheat tillage and water quality in the Southern Plains. Soil and Tillage Research 30, 33-48                                                                                                        | X |   |
| Sharpley et al., 2015         | Arkansas discovery farms: Documenting water quality benefits of on-farm conservation management and empowering farmers. Acta Agriculturae Scandinavica, Section B—Soil & Plant Science 65, 186-198 | X |   |
| Singer et al., 2004           | Tillage and compost affect yield of corn, soybean and wheat and soil                                                                                                                               | X |   |

|                             |                                                                                                                                                                                                        |   |   |
|-----------------------------|--------------------------------------------------------------------------------------------------------------------------------------------------------------------------------------------------------|---|---|
|                             | fertility. Agronomy Journal 96, 531-537                                                                                                                                                                |   |   |
| Singh and Kanwar, 1995      | Simulating NO <sub>3</sub> -N transport to subsurface drain flows as affected by tillage under continuous corn using modified RZWQM. Transactions of ASAE 38, 499-508                                  | X | X |
| Smith et al., 1991          | Water quality impacts associated with wheat culture in the southern plains. Journal of Environmental Quality 20, 244-249                                                                               | X | X |
| Staver and Brinsfield, 1998 | Using cereal grain winter cover crops to reduce groundwater nitrate contamination in the mid-Atlantic coastal plain. Journal of Soil and Water Conservation 53, 230-240                                | X |   |
| Stoddard et al., 2005       | Fertilizer, tillage, and dairy manure contributions to nitrate and herbicide leaching. Journal of Environmental Quality 34, 1354-1362                                                                  | X |   |
| Wang et al., 2015           | Conservation tillage and optimized fertilization reduce winter runoff losses of nitrogen and phosphorus from farmland in the Chaohu Lake region, China. Nutrient Cycling in Agroecosystems 101, 93-106 | X | X |
| Weed and Kanwar, 1996       | Nitrate and water present in and flowing from root-zone soil. Journal of Environmental Quality 25, 709-719                                                                                             | X | X |
| Zeimen et al., 2006         | Combining management practices to reduce sediment, nutrients and herbicides in runoff. Journal of Soil and Water Conservation 61, 258-267                                                              | X | X |
| Zhu et al., 2003            | Tillage Effects on Nitrate Leaching Measured by Pan and Wick Lysimeters. Soil Science Society of American Journal 67, 1517-1523                                                                        | X | X |

\*X mark indicates that data are available from the corresponding publication

Supplementary Table S2. Database of this study. Highlighted data indicate artificial drainage.

| outlet types | outlet category | tillage duration | tillage practice | location     | aridity  | crop type | fertilizer type | texture class | rainfall (mm) | Long-term mean rainfall (mm) | rainfall temporal resolution | Hydrological condition | nitrate concentration NT (ppm) | nitrate concentration CT (ppm) | nitrate load NT (kg/ha) | nitrate load CT (kg/ha) | Reference           |
|--------------|-----------------|------------------|------------------|--------------|----------|-----------|-----------------|---------------|---------------|------------------------------|------------------------------|------------------------|--------------------------------|--------------------------------|-------------------------|-------------------------|---------------------|
| ground water | ground          | short            | mold board       | maryland USA | non-arid | corn      | inorganic       | N/A           | 1043          | 1118                         | annual                       | normal                 | 12.25                          | 14.75                          |                         |                         | staver & brinsfield |
| ground water | ground          | short            | mold board       | maryland USA | non-arid | corn      | inorganic       | N/A           | 837           | 1118                         | annual                       | dry                    | 16.50                          | 16.25                          |                         |                         | staver & brinsfield |
| ground water | ground          | short            | mold board       | maryland USA | non-arid | corn      | inorganic       | N/A           | 976           | 1118                         | annual                       | dry                    | 17.63                          | 16.1                           |                         |                         | staver & brinsfield |
| ground water | ground          | short            | mold board       | maryland USA | non-arid | corn      | inorganic       | N/A           | 1492          | 1118                         | annual                       | wet                    | 19.00                          | 22.25                          |                         |                         | staver & brinsfield |
| ground water | ground          | med              | mold board       | maryland USA | non-arid | corn      | inorganic       | N/A           | 1335          | 1118                         | annual                       | wet                    | 9.50                           | 17.125                         |                         |                         | staver & brinsfield |
| ground water | ground          | med              | mold board       | maryland USA | non-arid | corn      | inorganic       | N/A           | 954           | 1118                         | annual                       | dry                    | 7.70                           | 14.3                           |                         |                         | staver & brinsfield |
| ground water | ground          | med              | mold board       | maryland USA | non-arid | corn      | inorganic       | N/A           | 1010          | 1118                         | annual                       | normal                 | 7.10                           | 12.125                         |                         |                         | staver & brinsfield |
| ground water | ground          | med              | mold board       | maryland USA | non-arid | corn      | inorganic       | N/A           | 1097          | 1118                         | annual                       | normal                 | 4.93                           | 8.7                            |                         |                         | staver & brinsfield |
| ground water | ground          | med              | mold board       | maryland USA | non-arid | corn      | inorganic       | N/A           | 1338          | 1118                         | annual                       | wet                    | 4.90                           | 7                              |                         |                         | staver & brinsfield |
| ground water | ground          | long             | mold board       | maryland USA | non-arid | corn      | inorganic       | N/A           | 1072          | 1118                         | annual                       | normal                 | 4.80                           | 6.3                            |                         |                         | staver & brinsfield |

| Detailed Data for Runoff and Drainage |          |            |            |                 |          |         |           |        |           |           |           |          |             | Summary Statistics |               |           |                     |
|---------------------------------------|----------|------------|------------|-----------------|----------|---------|-----------|--------|-----------|-----------|-----------|----------|-------------|--------------------|---------------|-----------|---------------------|
| Water Type                            | Location | Soil Depth | Soil Type  | Region          | Climate  | Crop    | Nutrient  | pH     | Area (ha) |           | Frequency | Moisture | Runoff (mm) |                    | Drainage (mm) |           | Reference           |
|                                       |          |            |            |                 |          |         |           |        | Actual    | Potential |           |          | Actual      | Potential          | Actual        | Potential |                     |
| ground water                          | ground   | long       | mold board | Maryland USA    | non-arid | corn    | inorganic | N/A    | 1404      | 1118      | annual    | wet      | 3.60        | 4                  | 0             | 0         | staver & brinsfield |
| runoff                                | surface  | med        | mold board | ontario Canada  | non-arid | corn    | inorganic | medium | 709       | 819       | annual    | dry      | 8.86        | 7.05               | 2.64          | 1.87      | drury et al         |
| runoff                                | surface  | med        | mold board | ontario Canada  | non-arid | corn    | inorganic | medium | 827       | 819       | annual    | normal   | 5.56        | 4.04               | 4.1           | 2.51      | drury et al         |
| runoff                                | surface  | med        | mold board | ontario Canada  | non-arid | corn    | inorganic | medium | 561       | 819       | annual    | dry      | 26.70       | 3.43               | 1.99          | 0.29      | drury et al         |
| runoff                                | surface  | med        | mold board | ontario Canada  | non-arid | corn    | inorganic | medium | 709       | 819       | annual    | dry      | 8.86        | 6.86               | 2.64          | 2.62      | drury et al         |
| runoff                                | surface  | med        | mold board | ontario Canada  | non-arid | corn    | inorganic | medium | 827       | 819       | annual    | normal   | 5.56        | 6.06               | 4.1           | 5.48      | drury et al         |
| runoff                                | surface  | med        | mold board | ontario Canada  | non-arid | corn    | inorganic | medium | 561       | 819       | annual    | dry      | 26.70       | 12.4               | 1.99          | 1.7       | drury et al         |
| drain water                           | ground   | med        | mold board | ontario Canada  | non-arid | corn    | inorganic | medium | 709       | 819       | annual    | dry      | 14.80       | 17.3               | 13.8          | 18        | drury et al         |
| drain water                           | ground   | med        | mold board | ontario Canada  | non-arid | corn    | inorganic | medium | 709       | 819       | annual    | dry      | 14.80       | 15.5               | 13.8          | 14.7      | drury et al         |
| drain water                           | ground   | med        | mold board | ontario Canada  | non-arid | corn    | inorganic | medium | 827       | 819       | annual    | normal   | 12.20       | 13                 | 20            | 28.5      | drury et al         |
| drain water                           | ground   | med        | mold board | ontario Canada  | non-arid | corn    | inorganic | medium | 827       | 819       | annual    | normal   | 12.20       | 12.3               | 20            | 19.8      | drury et al         |
| ground water                          | ground   | short      | mold board | mississippi USA | non-arid | soybean | none      | medium | 1783      | 1120      | annual    | wet      | 4.50        | 5.83               | 0             | 0         | schreiber & cullum  |
| ground water                          | ground   | short      | mold board | mississippi USA | non-arid | soybean | none      | medium | 1384      | 1120      | annual    | wet      | 4.09        | 8.06               | 0             | 0         | schreiber & cullum  |

| Detailed Analysis of Agricultural Data |           |       |            |                 |          |         |            |        |               |           |                |          |                  | Summary Metrics |                    |    |                                              |
|----------------------------------------|-----------|-------|------------|-----------------|----------|---------|------------|--------|---------------|-----------|----------------|----------|------------------|-----------------|--------------------|----|----------------------------------------------|
| Water Type                             | Soil Type | Depth | Irrigation | Region          | Climate  | Crop    | Fertilizer | pH     | Yield (kg/ha) |           | Season         | Moisture | Nutrient (kg/ha) |                 | References         |    |                                              |
|                                        |           |       |            |                 |          |         |            |        | Actual        | Potential |                |          | N                | P               |                    |    |                                              |
| ground water                           | ground    | short | mold board | mississippi USA | non-arid | soybean | none       | medium | 1126          | 1120      | annual         | normal   | 5.56             | 5.11            | schreiber & cullum |    |                                              |
| runoff                                 | surface   | short | mold board | mississippi USA | non-arid | soybean | none       | medium | 1783          | 1120      | annual         | wet      | 0.64             | 0.53            | schreiber & cullum |    |                                              |
| runoff                                 | surface   | short | mold board | mississippi USA | non-arid | soybean | none       | medium | 1384          | 1120      | annual         | wet      | 0.64             | 0.28            | schreiber & cullum |    |                                              |
| runoff                                 | surface   | short | mold board | mississippi USA | non-arid | soybean | none       | medium | 1126          | 1120      | annual         | normal   | 0.89             | 0.79            | schreiber & cullum |    |                                              |
| drain water                            | ground    | long  | mold board | iowa USA        | non-arid | corn    | inorganic  | medium | 1141          | 758       | growing season | wet      | 39.00            | 64              | 96                 | 52 | kanwar et al; baksh & kanwar; singh & kanwar |
| drain water                            | ground    | long  | mold board | iowa USA        | non-arid | corn    | inorganic  | medium | 892           | 758       | growing season | wet      | 19.00            | 34              | 56                 | 56 | kanwar et al; baksh & kanwar; singh & kanwar |
| drain water                            | ground    | long  | mold board | iowa USA        | non-arid | corn    | inorganic  | medium | 741           | 758       | growing season | normal   | 11.00            | 16              | 18                 | 17 | kanwar et al; baksh & kanwar; singh & kanwar |
| drain water                            | ground    | long  | mold board | iowa USA        | non-arid | corn    | inorganic  | medium | 1141          | 758       | growing season | wet      | 23.00            | 27              | 33                 | 34 | kanwar et al; baksh & kanwar; singh & kanwar |
| drain water                            | ground    | long  | mold board | iowa USA        | non-arid | corn    | inorganic  | medium | 892           | 758       | growing season | wet      | 17.00            | 22              | 27                 | 32 | kanwar et al; baksh & kanwar; singh & kanwar |
| drain water                            | ground    | long  | mold board | iowa USA        | non-arid | corn    | inorganic  | medium | 741           | 758       | growing season | normal   | 8.00             | 11              | 4                  | 9  | kanwar et al; baksh & kanwar; singh & kanwar |

| Detailed Crop and Soil Characteristics |           |        |            |          |          |         |           |           |              |              |                |          | Soil Moisture (mm) |          |          |          | Soil Salinity (dS/m)                         |          |          |  |
|----------------------------------------|-----------|--------|------------|----------|----------|---------|-----------|-----------|--------------|--------------|----------------|----------|--------------------|----------|----------|----------|----------------------------------------------|----------|----------|--|
| Drainage                               | Soil Type | Length | Boarding   | Region   | Climate  | Crop    | Soil Type | Fertility | Yield (t/ha) | Yield (t/ha) | Season         | Moisture | Moisture           | Moisture | Moisture | Salinity | Salinity                                     | Salinity | Salinity |  |
| drain water                            | ground    | long   | mold board | iowa USA | non-arid | soybean | none      | medium    | 1141         | 758          | growing season | wet      | 22.00              | 37       | 33       | 37       | kanwar et al; baksh & kanwar; singh & kanwar |          |          |  |
| drain water                            | ground    | long   | mold board | iowa USA | non-arid | soybean | none      | medium    | 892          | 758          | growing season | wet      | 11.00              | 15       | 29       | 38       | kanwar et al; baksh & kanwar; singh & kanwar |          |          |  |
| drain water                            | ground    | long   | mold board | iowa USA | non-arid | soybean | none      | medium    | 741          | 758          | growing season | normal   | 9.00               | 12       | 4        | 11       | kanwar et al; baksh & kanwar; singh & kanwar |          |          |  |
| drain water                            | ground    | long   | mold board | iowa USA | non-arid | corn    | inorganic | medium    | 1050         | 758          | growing season | wet      |                    |          | 107.20   | 58.1     | bakhsh & kanwar                              |          |          |  |
| drain water                            | ground    | long   | mold board | iowa USA | non-arid | corn    | inorganic | medium    | 970          | 758          | growing season | wet      |                    |          | 63.00    | 62.7     | bakhsh & kanwar                              |          |          |  |
| drain water                            | ground    | long   | mold board | iowa USA | non-arid | corn    | inorganic | medium    | 750          | 758          | growing season | dry      |                    |          | 20.00    | 19       | bakhsh & kanwar                              |          |          |  |
| drain water                            | ground    | long   | mold board | iowa USA | non-arid | corn    | inorganic | medium    | 1041         | 906          | annual         | wet      | 39.04              | 64.65    | 107.19   | 58.06    | weed & kanwar; bjorneberg et al              |          |          |  |
| drain water                            | ground    | long   | mold board | iowa USA | non-arid | corn    | inorganic | medium    | 965          | 906          | annual         | normal   | 18.61              | 34.2     | 62.46    | 63.13    | weed & kanwar; bjorneberg et al              |          |          |  |
| drain water                            | ground    | long   | mold board | iowa USA | non-arid | corn    | inorganic | medium    | 744          | 906          | annual         | dry      | 8.08               | 11.95    | 11.72    | 13.26    | weed & kanwar; bjorneberg et al              |          |          |  |
| drain water                            | ground    | long   | mold board | iowa USA | non-arid | corn    | inorganic | medium    | 1041         | 906          | annual         | wet      | 18.68              | 38.63    | 31.63    | 41.21    | weed & kanwar; bjorneberg et al              |          |          |  |
| drain water                            | ground    | long   | mold board | iowa USA | non-arid | corn    | inorganic | medium    | 965          | 906          | annual         | normal   | 17.07              | 24.03    | 30.64    | 36.14    | weed & kanwar; bjorneberg et al              |          |          |  |
| drain water                            | ground    | long   | mold board | iowa USA | non-arid | corn    | inorganic | medium    | 744          | 906          | annual         | dry      | 7.56               | 8.02     | 3.65     | 6.45     | weed & kanwar; bjorneberg et al              |          |          |  |

| Study 1: Drainage and Leachate |           |       |            |           |          |         |              |           |            |             |           |          | Study 2: Runoff |             |             |             |               |
|--------------------------------|-----------|-------|------------|-----------|----------|---------|--------------|-----------|------------|-------------|-----------|----------|-----------------|-------------|-------------|-------------|---------------|
| Flow Type                      | Soil Type | Depth | Material   | Location  | Climate  | Crop    | Soil Texture | Soil Type | Area (m²)  | Volume (m³) | Frequency | Moisture | Parameter 1     | Parameter 2 | Parameter 3 | Parameter 4 | Reference     |
| drain water                    | ground    | long  | mold board | iowa USA  | non-arid | soybean | none         | medium    | 1041       | 906         | annual    | wet      | 23.04           | 26.08       | 36.47       | 37.95       | weed & kanwar |
| drain water                    | ground    | long  | mold board | iowa USA  | non-arid | soybean | none         | medium    | 965        | 906         | annual    | normal   | 11.20           | 15.38       | 32.11       | 41.48       | weed & kanwar |
| drain water                    | ground    | long  | mold board | iowa USA  | non-arid | soybean | none         | medium    | 744        | 906         | annual    | dry      | 6.11            | 7.89        | 3.61        | 7.69        | weed & kanwar |
| leachate                       | ground    | short | mold board | idaho USA | arid     | corn    | inorganic    | medium    | irrigation | 210         | annual    | N/A      | 9.00            | 10          |             |             | meek et al    |
| leachate                       | ground    | short | mold board | idaho USA | arid     | wheat   | inorganic    | medium    | irrigation | 210         | annual    | N/A      | 4.00            | 10          |             |             | meek et al    |
| runoff                         | surface   | long  | mold board | ohio USA  | non-arid | corn    | inorganic    | fine      | 562        | 858         | annual    | dry      | 0.70            | 0.3         | 0.08        | 0.01        | logan et al   |
| runoff                         | surface   | long  | mold board | ohio USA  | non-arid | soybean | none         | fine      | 562        | 858         | annual    | dry      | 0.40            | 0.6         | 0.03        | 0.02        | logan et al   |
| runoff                         | surface   | long  | mold board | ohio USA  | non-arid | corn    | inorganic    | fine      | 462        | 858         | annual    | dry      | 0.70            | 0.5         | 0.28        | 0.19        | logan et al   |
| runoff                         | surface   | long  | mold board | ohio USA  | non-arid | soybean | none         | fine      | 462        | 858         | annual    | dry      | 1.10            | 1           | 0.59        | 2.34        | logan et al   |
| runoff                         | surface   | long  | mold board | ohio USA  | non-arid | corn    | inorganic    | fine      | 749        | 858         | annual    | dry      | 4.00            | 0.7         | 1.52        | 0.15        | logan et al   |
| runoff                         | surface   | long  | mold board | ohio USA  | non-arid | soybean | none         | fine      | 749        | 858         | annual    | dry      | 0.60            | 0.6         | 0.22        | 0.13        | logan et al   |
| runoff                         | surface   | long  | mold board | ohio USA  | non-arid | corn    | inorganic    | fine      | 1126       | 858         | annual    | wet      | 1.10            | 1.2         | 1.17        | 0.86        | logan et al   |
| runoff                         | surface   | long  | mold board | ohio USA  | non-arid | soybean | none         | fine      | 1126       | 858         | annual    | wet      | 1.30            | 1.3         | 1.96        | 0.96        | logan et al   |



| Detailed Input Parameters |           |             |            |              |          |         |              |               |                   |                 |                            |               | Key Performance Indicators (KPIs) |                   |               |             |               |        |
|---------------------------|-----------|-------------|------------|--------------|----------|---------|--------------|---------------|-------------------|-----------------|----------------------------|---------------|-----------------------------------|-------------------|---------------|-------------|---------------|--------|
| Flow Type                 | Flow Path | Flow Length | Soil Type  | Location     | Climate  | Crop    | Soil Texture | Particle Size | Flow Rate (L/min) | Flow Volume (L) | Flow Frequency             | Flow Duration | Efficiency (%)                    | Throughput (kg/h) | Retention (%) | Loss (kg/h) | Quality Index | Source |
| drain water               | ground    | long        | mold board | ohio USA     | non-arid | corn    | inorganic    | fine          | 562               | 858             | annual                     | dry           | 1.30                              | 0.01              | 0.1           | 1E-06       | logan et al   |        |
| drain water               | ground    | long        | mold board | ohio USA     | non-arid | soybean | none         | fine          | 562               | 858             | annual                     | dry           | 2.10                              | 1.7               | 3.14          | 2.82        | logan et al   |        |
| drain water               | ground    | long        | mold board | ohio USA     | non-arid | corn    | inorganic    | fine          | 462               | 858             | annual                     | dry           | 4.50                              | 4.9               | 2.04          | 2.82        | logan et al   |        |
| drain water               | ground    | long        | mold board | ohio USA     | non-arid | soybean | none         | fine          | 462               | 858             | annual                     | dry           | 4.90                              | 5.5               | 2.04          | 3           | logan et al   |        |
| drain water               | ground    | long        | mold board | ohio USA     | non-arid | corn    | inorganic    | fine          | 749               | 858             | annual                     | dry           | 6.70                              | 11.8              | 3.81          | 28.6        | logan et al   |        |
| drain water               | ground    | long        | mold board | ohio USA     | non-arid | soybean | none         | fine          | 749               | 858             | annual                     | dry           | 19.60                             | 10                | 34.8          | 14.3        | logan et al   |        |
| drain water               | ground    | long        | mold board | ohio USA     | non-arid | corn    | inorganic    | fine          | 1126              | 858             | annual                     | wet           | 15.00                             | 17.8              | 54.8          | 83.4        | logan et al   |        |
| drain water               | ground    | long        | mold board | ohio USA     | non-arid | soybean | none         | fine          | 1126              | 858             | annual                     | wet           | 14.70                             | 17.1              | 26.3          | 86.4        | logan et al   |        |
| runoff                    | surface   | med         | mold board | kentucky USA | non-arid | corn    | inorganic    | medium        | rain simulator    | 90 min          | 66 mm/h rainfall intensity | N/A           | 15.10                             | 9.5               | 0.1           | 1.2         | seta et al    |        |
| runoff                    | surface   | med         | mold board | kentucky USA | non-arid | corn    | inorganic    | medium        | rain simulator    | 90 min          | 66 mm/h rainfall intensity | N/A           | 15.10                             | 8                 | 0.1           | 0.5         | seta et al    |        |
| runoff                    | surface   | med         | mold board | kentucky USA | non-arid | corn    | inorganic    | medium        | rain simulator    | 90 min          | 66 mm/h rainfall intensity | N/A           | 12.10                             | 6.5               | 0.4           | 1.3         | seta et al    |        |
| runoff                    | surface   | med         | mold board | kentucky USA | non-arid | corn    | inorganic    | medium        | rain simulator    | 90 min          | 66 mm/h rainfall intensity | N/A           | 12.10                             | 5.8               | 0.4           | 0.9         | seta et al    |        |

| Study 1: Drainage Systems and Soil Characteristics |           |                |                   |                  |          |         |                |              |                 |                    |                       |         |                | Study 2: Runoff and Soil Moisture |                    |                       |               |                |           |
|----------------------------------------------------|-----------|----------------|-------------------|------------------|----------|---------|----------------|--------------|-----------------|--------------------|-----------------------|---------|----------------|-----------------------------------|--------------------|-----------------------|---------------|----------------|-----------|
| Drainage Type                                      | Soil Type | Drainage Depth | Soil Treatment    | Location         | Climate  | Crop    | Organic Matter | Soil Texture | Soil Depth (cm) | Soil Moisture (mm) | Soil Temperature (°C) | Soil pH | Soil EC (dS/m) | Runoff (mm)                       | Soil Moisture (mm) | Soil Temperature (°C) | Soil pH       | Soil EC (dS/m) | Reference |
| drain water                                        | ground    | short          | mold board        | kentville Canada | non-arid | corn    | organic        | coarse       | 1224            | 1118               | annual                | normal  | 10.65          | 11.2                              | 45.55              | 37.4                  | Fuller et al  |                |           |
| drain water                                        | ground    | short          | chisel & disk-ing | kentville Canada | non-arid | soybean | none           | coarse       | 996             | 1118               | annual                | dry     | 10.74          | 10.465                            | 31.6               | 20.1                  | Fuller et al  |                |           |
| drain water                                        | ground    | short          | chisel & disk-ing | kentville Canada | non-arid | wheat   | inorganic      | coarse       | 1109            | 1118               | annual                | normal  | 9.85           | 10.88                             | 23.65              | 21.8                  | Fuller et al  |                |           |
| drain water                                        | ground    | short          | chisel & disk-ing | kentville Canada | non-arid | corn    | organic        | coarse       | 1235            | 1118               | annual                | wet     | 7.58           | 6.09                              | 26.7               | 20.2                  | Fuller et al  |                |           |
| drain water                                        | ground    | short          | chisel & disk-ing | kentville Canada | non-arid | n/a     | none           | coarse       | 886             | 1118               | annual                | dry     | 7.74           | 6.785                             | 23.4               | 20.7                  | Fuller et al  |                |           |
| runoff                                             | surface   | short          | mold board        | kentucky USA     | non-arid | corn    | inorganic      | medium       | 1264            | 1147               | annual                | wet     |                |                                   | 0.05               | 0.056                 | blevins et al |                |           |
| runoff                                             | surface   | short          | mold board        | kentucky USA     | non-arid | corn    | inorganic      | medium       | 927             | 1147               | annual                | dry     |                |                                   | 1.42               | 1.267                 | blevins et al |                |           |
| runoff                                             | surface   | short          | mold board        | kentucky USA     | non-arid | corn    | inorganic      | medium       | 909             | 1147               | annual                | dry     |                |                                   | 0.28               | 0.613                 | blevins et al |                |           |
| runoff                                             | surface   | short          | mold board        | kentucky USA     | non-arid | corn    | inorganic      | medium       | 902             | 1147               | annual                | dry     |                |                                   | 0.18               | 0.468                 | blevins et al |                |           |
| runoff                                             | surface   | short          | mold board        | kentucky USA     | non-arid | corn    | inorganic      | medium       | 1264            | 1147               | annual                | wet     |                |                                   | 0.05               | 0.032                 | blevins et al |                |           |

| runoff   | surface | short | mold board | kentucky USA | non-arid | corn  | inorganic | medium | 927        | 1147 | annual         | dry |       |      | 1.42 | 0.964 | blevins et al   |
|----------|---------|-------|------------|--------------|----------|-------|-----------|--------|------------|------|----------------|-----|-------|------|------|-------|-----------------|
| runoff   | surface | short | mold board | kentucky USA | non-arid | corn  | inorganic | medium | 909        | 1147 | annual         | dry |       |      | 0.28 | 0.229 | blevins et al   |
| runoff   | surface | short | mold board | kentucky USA | non-arid | corn  | inorganic | medium | 902        | 1147 | annual         | dry |       |      | 0.18 | 0.26  | blevins et al   |
| leaching | ground  | short | mold board | maryland USA | non-arid | wheat | inorganic | medium | 542        | 637  | growing season | dry | 15.55 | 6.95 | 3.50 | 1.5   | meisinger et al |
| drainage | ground  | short | mold board | maryland USA | non-arid | wheat | inorganic | medium | 542        | 637  | growing season | dry |       |      | 2.80 | 2.4   | meisinger et al |
| leachate | ground  | short | mold board | maryland USA | non-arid | wheat | inorganic | medium | 570        | 637  | growing season | dry | 7.35  | 6.25 | 2.20 | 1.3   | meisinger et al |
| drainage | ground  | short | mold board | maryland USA | non-arid | wheat | inorganic | medium | 570        | 637  | growing season | dry |       |      | 1.90 | 1.45  | meisinger et al |
| leachate | ground  | short | mold board | maryland USA | non-arid | wheat | inorganic | medium | 740        | 637  | growing season | wet | 2.85  | 2.95 | 1.40 | 1.3   | meisinger et al |
| drainage | ground  | short | mold board | maryland USA | non-arid | wheat | inorganic | medium | 740        | 637  | growing season | wet |       |      | 3.90 | 3.75  | meisinger et al |
| leachate | ground  | short | mold board | new zealand  | non-arid | wheat | inorganic | medium | irrigation | 174  | winter         | N/A | 42    | 60   |      |       | fraser et al    |
| leachate | ground  | short | mold board | new zealand  | non-arid | wheat | inorganic | medium | irrigation | 174  | winter         | N/A | 46.00 | 37   |      |       | fraser et al    |
| leachate | ground  | short | mold board | new zealand  | non-arid | wheat | inorganic | medium | irrigation | 174  | winter         | N/A | 42    | 52   |      |       | fraser et al    |
| leachate | ground  | short | mold board | new zealand  | non-arid | wheat | inorganic | medium | irrigation | 174  | winter         | N/A | 46.00 | 17   |      |       | fraser et al    |

| Detailed Data for Figure 1: Soil Properties and Crop Yields |           |            |              |                      |          |         |           |        |                 |             |                |        |               |              |               |               |                |
|-------------------------------------------------------------|-----------|------------|--------------|----------------------|----------|---------|-----------|--------|-----------------|-------------|----------------|--------|---------------|--------------|---------------|---------------|----------------|
| Crop                                                        | Soil Type | Soil Depth | Soil Texture | Location             | Climate  | Crop    | Nutrient  | pH     | Soil Properties |             |                |        | Crop Yields   |              |               |               |                |
|                                                             |           |            |              |                      |          |         |           |        | Moisture        | Temperature | Salinity       | EC     | Yield (kg/ha) | Yield (t/ha) | Yield (kg/ha) | Yield (t/ha)  | Reference      |
| leachate                                                    | ground    | med        | moldboard    | michigan             | non-arid | corn    | inorganic | medium | 855.9           | 8           | 805.9          | annual | normal        | 10           | 12            | gerakis et al |                |
| leachate                                                    | ground    | med        | moldboard    | michigan             | non-arid | corn    | inorganic | medium | 1046.7          | 7           | 805.9          | annual | wet           | 5            | 8             | gerakis et al |                |
| leachate                                                    | ground    | med        | moldboard    | michigan             | non-arid | corn    | inorganic | medium | 684.0           | 2           | 805.9          | annual | dry           | 60           | 70            | gerakis et al |                |
| drainwater                                                  | ground    | short      | moldboard    | street ridge, canada | non-arid | corn    | organic   | coarse | 669.9           | 701.3       | growing season | normal | 2.83          | 4.34         | 7.1           | 9.33          | mkhabela et al |
| runoff                                                      | surface   | short      | moldboard    | street ridge, canada | non-arid | corn    | organic   | coarse | 669.9           | 701.3       | growing season | normal | 2.5           | 3.1          | 17.05         | 10.91         | mkhabela et al |
| drainwater                                                  | ground    | short      | moldboard    | street ridge, canada | non-arid | corn    | organic   | coarse | 712.1           | 701.3       | growing season | normal | 1.02          | 2.61         | 2.15          | 5.13          | mkhabela et al |
| runoff                                                      | surface   | short      | moldboard    | street ridge, canada | non-arid | corn    | organic   | coarse | 712.1           | 701.3       | growing season | normal | 4.65          | 3.91         | 4.61          | 7.17          | mkhabela et al |
| drainwater                                                  | ground    | short      | moldboard    | BEEC, canada         | non-arid | soybean | organic   | n/a    | 616.7           | 663.4       | growing season | normal | 5.17          | 7.03         | 14.57         | 11.72         | mkhabela et al |
| drainwater                                                  | ground    | short      | moldboard    | BEEC, canada         | non-arid | soybean | organic   | n/a    | 881.9           | 663.4       | growing season | wet    | 6.91          | 10.54        | 22.37         | 18.19         | mkhabela et al |
| leachate                                                    | ground    | long       | moldboard    | iowa USA             | non-arid | soybean | n/a       | medium | 856             | 615         | growing season | wet    | 1216          | 902          |               |               | singer et al   |
| leachate                                                    | ground    | long       | moldboard    | iowa USA             | non-arid | soybean | n/a       | medium | 380             | 615         | growing season | dry    | 1911          | 1240         |               |               | singer et al   |
| leachate                                                    | ground    | long       | moldboard    | iowa USA             | non-arid | soybean | n/a       | medium | 543             | 615         | growing season | dry    | 401           | 831          |               |               | singer et al   |

| type        | soil    | depth | type      | location     | climate  | crop    | texture   | depth  | precip                            | temp | season         | freq   | precip | temp  | temp | temp | temp | author            |
|-------------|---------|-------|-----------|--------------|----------|---------|-----------|--------|-----------------------------------|------|----------------|--------|--------|-------|------|------|------|-------------------|
| leachate    | ground  | long  | moldboard | iowa USA     | non-arid | soybean | n/a       | medium | 559                               | 615  | growing season | normal | 294    | 385   |      |      |      | singer et al      |
| runoff      | surface | med   | moldboard | michigan USA | non-arid | corn    | inorganic | medium | 963                               | 863  | annual         | wet    | 3.5    | 6     | 19.5 | 21   |      | rasse & smucker   |
| runoff      | surface | med   | moldboard | michigan USA | non-arid | corn    | inorganic | medium | 845                               | 863  | annual         | normal | 2      | 4     | 5    | 8    |      | rasse & smucker   |
| groundwater | ground  | short | moldboard | delaware USA | non-arid | corn    | inorganic | coarse | 276 + irrigation 318, total = 594 |      |                | N/A    | 12.70  | 16.7  |      |      |      | ritter et al      |
| groundwater | ground  | short | moldboard | delaware USA | non-arid | corn    | inorganic | coarse | 330 + irrigation 272, total = 602 |      |                | N/A    | 13.65  | 24.2  |      |      |      | ritter et al      |
| groundwater | ground  | short | moldboard | delaware USA | non-arid | corn    | inorganic | coarse | 276 + irrigation 318, total = 594 |      |                | N/A    | 12.45  | 15.52 |      |      |      | ritter et al      |
| groundwater | ground  | short | moldboard | delaware USA | non-arid | corn    | inorganic | coarse | 330 + irrigation 272, total = 602 |      |                | N/A    | 16.80  | 19.5  |      |      |      | ritter et al      |
| groundwater | ground  | short | moldboard | delaware USA | non-arid | corn    | inorganic | coarse | 276 + irrigation 318, total = 594 |      |                | N/A    |        |       | 29.1 | 31.6 |      | ritter et al      |
| groundwater | ground  | short | moldboard | delaware USA | non-arid | corn    | inorganic | coarse | 330 + irrigation 272, total = 602 |      |                | N/A    |        |       | 31.6 | 30.4 |      | ritter et al      |
| runoff      | surface | short | moldboard | texas USA    | arid     | corn    | inorganic | fine   | storm events                      |      |                | N/A    |        |       | 2.6  | 5.5  |      | richardson & king |
| runoff      | surface | short | moldboard | texas USA    | arid     | wheat   | inorganic | fine   | storm events                      |      |                | N/A    |        |       | 4.4  | 13.3 |      | richardson & king |
| runoff      | surface | short | moldboard | china        | arid     | wheat   | inorganic | medium | storm events                      |      |                | N/A    | 1.5    | 1.125 | 0.4  | 0.53 |      | wang et al        |
| runoff      | surface | short | moldboard | china        | arid     | wheat   | inorganic | medium | storm events                      |      |                | N/A    | 1.725  | 1.465 | 0.8  | 1.13 |      | wang et al        |

| Detailed Drainage System Performance Analysis |           |             |            |                |          |      |           |         |                           |                       |                |                |                    | Overall System Metrics |                      |            |                       |
|-----------------------------------------------|-----------|-------------|------------|----------------|----------|------|-----------|---------|---------------------------|-----------------------|----------------|----------------|--------------------|------------------------|----------------------|------------|-----------------------|
| Drain Type                                    | Soil Type | Drain Depth | Material   | Region         | Climate  | Crop | pH        | Texture | Infiltration Rate (mm/hr) | Water Table Depth (m) | Season         | Moisture Level | Annual Performance |                        | Seasonal Performance |            | Researcher            |
|                                               |           |             |            |                |          |      |           |         |                           |                       |                |                | Efficiency (%)     | Cost (\$/m)            | Spring (%)           | Summer (%) |                       |
| drain water                                   | ground    | short       | mold board | ontario Canada | non-arid | corn | inorganic | fine    | 987                       | 864                   | annual         | wet            | 18.7               | 20.3                   | 27.2                 | 28.8       | patni et al           |
| drain water                                   | ground    | short       | mold board | ontario Canada | non-arid | corn | inorganic | fine    | 728                       | 864                   | annual         | dry            | 12.8               | 16.8                   | 15.8                 | 10.2       | patni et al           |
| drain water                                   | ground    | short       | mold board | ontario Canada | non-arid | corn | inorganic | fine    | 986                       | 864                   | annual         | wet            | 25.4               | 30.2                   | 40.6                 | 39.1       | patni et al           |
| drain water                                   | ground    | short       | mold board | ontario Canada | non-arid | corn | inorganic | fine    | 800                       | 864                   | annual         | normal         | 20.7               | 26.3                   | 38.2                 | 30         | patni et al           |
| drain water                                   | ground    | short       | mold board | minnesota USA  | non-arid | corn | inorganic | medium  | 3                         | 618                   | growing season | dry            | 6                  | 4.8                    | 2.9                  | 1.4        | randall & iragavarapu |
| drain water                                   | ground    | short       | mold board | minnesota USA  | non-arid | corn | inorganic | medium  | 127                       | 618                   | growing season | dry            | 9                  | 8.1                    | 49.4                 | 41.1       | randall & iragavarapu |
| drain water                                   | ground    | short       | mold board | minnesota USA  | non-arid | corn | inorganic | medium  | 103                       | 618                   | growing season | dry            | 15                 | 10.6                   | 36.8                 | 39.3       | randall & iragavarapu |
| drain water                                   | ground    | short       | mold board | minnesota USA  | non-arid | corn | inorganic | medium  | 97                        | 618                   | growing season | dry            | 12.5               | 12.8                   | 20                   | 17.2       | randall & iragavarapu |
| drain water                                   | ground    | short       | mold board | minnesota USA  | non-arid | corn | inorganic | medium  | 125                       | 618                   | growing season | dry            | 13.6               | 14                     | 60                   | 55.3       | randall & iragavarapu |
| drain water                                   | ground    | med         | mold board | minnesota USA  | non-arid | corn | inorganic | medium  | 92                        | 618                   | growing season | dry            | 7.8                | 9.2                    | 3.2                  | 3.8        | randall & iragavarapu |
| drain water                                   | ground    | med         | mold board | minnesota USA  | non-arid | corn | inorganic | medium  | 67                        | 618                   | growing season | dry            | 9.4                | 14.7                   | 5.9                  | 6.4        | randall & iragavarapu |
| drain water                                   | ground    | med         | mold board | minnesota USA  | non-arid | corn | inorganic | medium  | 65                        | 618                   | growing season | dry            | 13.4               | 11.5                   | 5                    | 2.5        | randall & iragavarapu |
| drain water                                   | ground    | med         | mold board | minnesota USA  | non-arid | corn | inorganic | medium  | 124                       | 618                   | growing season | dry            | 20.8               | 23.9                   | 112.2                | 111.9      | randall & iragavarapu |

| Detailed Experimental Parameters |           |       |            |               |          |         |            |          |                |              |                |          | Key Performance Indicators (KPIs) |                |               |                    | Researcher            |
|----------------------------------|-----------|-------|------------|---------------|----------|---------|------------|----------|----------------|--------------|----------------|----------|-----------------------------------|----------------|---------------|--------------------|-----------------------|
| Process                          | Soil Type | Depth | Material   | Location      | Climate  | Crop    | Nutrient   | Humidity | Temp (°C)      | Duration (h) | Season         | Moisture | Yield (kg)                        | Efficiency (%) | Water Use (L) | CO2 (g)            | Notes                 |
| drain water                      | ground    | med   | mold board | minnesota USA | non-arid | corn    | inorg anic | medi um  | 151            | 618          | growing season | dry      | 15.3                              | 24             | 113.1         | 138.7              | randall & iragavarapu |
| drain water                      | ground    | long  | mold board | minnesota USA | non-arid | corn    | inorg anic | medi um  | 114            | 618          | growing season | dry      | 8.9                               | 13.5           | 43.1          | 55                 | randall & iragavarapu |
| runoff                           | surface   | long  | mold board | nebraska, USA | arid     | soybean | organ ic   | medi um  | rain simulator |              |                | n/a      |                                   | 0.4            | 0.78          | gilley et al       |                       |
| runoff                           | surface   | long  | mold board | nebraska, USA | arid     | soybean | organ ic   | medi um  | rain simulator |              |                | n/a      |                                   | 0.38           | 1.1           | gilley et al       |                       |
| runoff                           | surface   | long  | mold board | nebraska, USA | arid     | soybean | none       | medi um  | rain simulator |              |                | n/a      | 1.4                               | 0.27           |               | gilley et al       |                       |
| runoff                           | surface   | long  | mold board | nebraska, USA | arid     | soybean | organ ic   | medi um  | rain simulator |              |                | n/a      | 2.43                              | 0.71           |               | gilley et al       |                       |
| runoff                           | surface   | long  | mold board | nebraska, USA | arid     | soybean | organ ic   | medi um  | rain simulator |              |                | n/a      | 2.2                               | 0.55           |               | gilley et al       |                       |
| runoff                           | surface   | long  | mold board | nebraska, USA | arid     | soybean | organ ic   | medi um  | rain simulator |              |                | n/a      | 3.63                              | 0.84           |               | gilley et al       |                       |
| runoff                           | surface   | long  | mold board | nebraska, USA | arid     | soybean | organ ic   | medi um  | rain simulator |              |                | n/a      | 1.81                              | 0.64           |               | gilley et al       |                       |
| runoff                           | surface   | long  | mold board | arkansas USA  | non-arid | n/a     | inorg anic | N/A      | n/a            |              |                | n/a      | 0.575                             | 0.435          |               | sharpley et al     |                       |
| runoff                           | ground    | long  | mold board | arkansas USA  | non-arid | n/a     | inorg anic | N/A      | n/a            |              |                | n/a      | 0.1                               | 0.05           |               | sharpley et al     |                       |
| runoff                           | ground    | short | mold board | Oklahoma, USA | arid     | wheat   | inorg anic | medi um  | n/a            | 740          | annual         | n/a      | 4.8                               | 4              |               | Sharpley and Smith |                       |
| ground water                     | ground    | short | mold board | Oklahoma, USA | arid     | wheat   | inorg anic | medi um  | n/a            | 740          | annual         | n/a      | 5.1                               | 3.2            |               | Sharpley and Smith |                       |

| water        | depth   | duration | board      | country       | climate  | crops | soil       | type    | irrigation | precipitation | temp   | humidity | evapotranspiration | ET/precip | ET/precip | ET/precip | ET/precip | ET/precip     | author             |
|--------------|---------|----------|------------|---------------|----------|-------|------------|---------|------------|---------------|--------|----------|--------------------|-----------|-----------|-----------|-----------|---------------|--------------------|
| ground water | ground  | short    | mold board | Oklahoma, USA | arid     | wheat | inorg anic | medi um | n/a        | 740           | annual | n/a      | 11.5               | 2         |           |           |           |               | Sharpley and Smith |
| ground water | ground  | short    | mold board | Oklahoma, USA | arid     | wheat | inorg anic | medi um | n/a        | 740           | annual | n/a      | 12                 | 1         |           |           |           |               | Sharpley and Smith |
| ground water | ground  | short    | mold board | Oklahoma, USA | arid     | wheat | inorg anic | medi um | n/a        | 740           | annual | n/a      | 12                 | 2.2       |           |           |           |               | Sharpley and Smith |
| ground water | ground  | med      | mold board | Oklahoma, USA | arid     | wheat | inorg anic | medi um | n/a        | 740           | annual | n/a      | 19                 | 1.5       |           |           |           |               | Sharpley and Smith |
| ground water | ground  | med      | mold board | Oklahoma, USA | arid     | wheat | inorg anic | medi um | n/a        | 740           | annual | n/a      | 16                 | 1.5       |           |           |           |               | Sharpley and Smith |
| ground water | ground  | med      | mold board | Oklahoma, USA | arid     | wheat | inorg anic | medi um | n/a        | 740           | annual | n/a      | 20                 | 2         |           |           |           |               | Sharpley and Smith |
| ground water | ground  | short    | mold board | Oklahoma, USA | arid     | wheat | inorg anic | medi um | n/a        |               |        | n/a      | 0.5                | 5         |           |           |           |               | Sharpley and Smith |
| ground water | ground  | short    | mold board | Oklahoma, USA | arid     | wheat | inorg anic | medi um | n/a        |               |        | n/a      | 1.5                | 4.3       |           |           |           |               | Sharpley and Smith |
| ground water | ground  | short    | mold board | Oklahoma, USA | arid     | wheat | inorg anic | medi um | n/a        |               |        | n/a      | 7                  | 3         |           |           |           |               | Sharpley and Smith |
| ground water | surface | short    | mold board | Oklahoma, USA | arid     | wheat | inorg anic | medi um | 900        | 750           | annual | wet      | 2.04               | 1.38      | 3.16      | 1.48      |           | smith et al   |                    |
| ground water | surface | short    | mold board | Oklahoma, USA | arid     | wheat | inorg anic | medi um | 600        | 730           | annual | dry      | 1.47               | 1.03      | 0.83      | 0.7       |           | smith et al   |                    |
| runoff       | ground  | med      | mold board | wisconsin USA | non-arid | corn  | inorg anic | medi um | 990        | 812           | annual | wet      | 4.2                | 9.5       | 14        | 31        |           | brye & norman |                    |
| runoff       | ground  | short    | rototiler  | china         | arid     | corn  | inorg anic | medi um | irrigation |               |        | n/a      | 10                 | 10        | 15.1      | 13.4      |           | huang et al   |                    |



| Study    | Soil Type | Depth | Crop      | Region | Climate | Fertilizer | Irrigation | Fertilizer Type | Irrigation Type | Yield (t/ha) |      |      |      |      | Author      |
|----------|-----------|-------|-----------|--------|---------|------------|------------|-----------------|-----------------|--------------|------|------|------|------|-------------|
|          |           |       |           |        |         |            |            |                 |                 | 2018         | 2019 | 2020 | 2021 | 2022 |             |
| leachate | ground    | short | rototiler | china  | arid    | corn       | organic    | medium          | irrigation      | n/a          | 7.6  | 5    | 5.3  | 3.4  | huang et al |
| leachate | ground    | short | rototiler | china  | arid    | corn       | organic    | medium          | irrigation      | n/a          | 20   | 20   | 26.5 | 24   | huang et al |
| leachate | ground    | short | rototiler | china  | arid    | corn       | inorganic  | medium          | irrigation      | n/a          | 37.5 | 35   | 51.5 | 39   | huang et al |
| leachate | ground    | short | rototiler | china  | arid    | corn       | organic    | medium          | irrigation      | n/a          | 25   | 20   | 32.1 | 20.9 | huang et al |
| leachate | ground    | short | rototiler | china  | arid    | corn       | organic    | medium          | irrigation      | n/a          | 66   | 64   | 76.6 | 52.9 | huang et al |
| leachate | ground    | short | rototiler | china  | arid    | corn       | inorganic  | medium          | irrigation      | n/a          | 50   | 37.5 | 11.8 | 6.3  | huang et al |
| leachate | ground    | short | rototiler | china  | arid    | corn       | organic    | medium          | irrigation      | n/a          | 22   | 23   | 2.3  | 1.6  | huang et al |
| leachate | ground    | short | rototiler | china  | arid    | corn       | organic    | medium          | irrigation      | n/a          | 70   | 70   | 16.5 | 12.2 | huang et al |
| leachate | ground    | short | rototiler | china  | arid    | corn       | inorganic  | medium          | irrigation      | n/a          | 34   | 25   | 27.9 | 18.8 | huang et al |
| leachate | ground    | short | rototiler | china  | arid    | corn       | organic    | medium          | irrigation      | n/a          | 10   | 5    | 7.3  | 3.2  | huang et al |
| leachate | ground    | short | rototiler | china  | arid    | corn       | organic    | medium          | irrigation      | n/a          | 75   | 55   | 61.7 | 39.6 | huang et al |
| leachate | ground    | short | rototiler | china  | arid    | corn       | inorganic  | medium          | irrigation      | n/a          | 37.5 | 30   | 29.8 | 19   | huang et al |
| leachate | ground    | short | rototiler | china  | arid    | corn       | organic    | medium          | irrigation      | n/a          | 12.5 | 10   | 12.4 | 7    | huang et al |

| leachate | type   | depth | rototiller | country | climate | crop  | fertilizer |           |            | irrigation | n    | p    | k    | ca   | mg          | author |
|----------|--------|-------|------------|---------|---------|-------|------------|-----------|------------|------------|------|------|------|------|-------------|--------|
|          |        |       |            |         |         |       | organic    | inorganic | medium     |            |      |      |      |      |             |        |
| leachate | ground | short | rototiller | china   | arid    | corn  | organic    | medium    | irrigation | n/a        | 60   | 50   | 46.3 | 28.5 | huang et al |        |
| leachate | ground | short | rototiller | china   | arid    | wheat | inorganic  | medium    | irrigation | n/a        | 10   | 10   | 3.9  | 3.2  | huang et al |        |
| leachate | ground | short | rototiller | china   | arid    | wheat | organic    | medium    | irrigation | n/a        | 7.6  | 5    | 2.7  | 1.7  | huang et al |        |
| leachate | ground | short | rototiller | china   | arid    | wheat | organic    | medium    | irrigation | n/a        | 20   | 20   | 12.5 | 8.4  | huang et al |        |
| leachate | ground | short | rototiller | china   | arid    | wheat | inorganic  | medium    | irrigation | n/a        | 37.5 | 35   | 3.9  | 3.1  | huang et al |        |
| leachate | ground | short | rototiller | china   | arid    | wheat | organic    | medium    | irrigation | n/a        | 25   | 20   | 1.8  | 1.3  | huang et al |        |
| leachate | ground | short | rototiller | china   | arid    | wheat | organic    | medium    | irrigation | n/a        | 66   | 64   | 16.8 | 13.3 | huang et al |        |
| leachate | ground | short | rototiller | china   | arid    | wheat | inorganic  | medium    | irrigation | n/a        | 50   | 37.5 | 31.5 | 25.3 | huang et al |        |
| leachate | ground | short | rototiller | china   | arid    | wheat | organic    | medium    | irrigation | n/a        | 22   | 23   | 18.8 | 12.8 | huang et al |        |
| leachate | ground | short | rototiller | china   | arid    | wheat | organic    | medium    | irrigation | n/a        | 70   | 70   | 60.7 | 47.2 | huang et al |        |
| leachate | ground | short | rototiller | china   | arid    | wheat | inorganic  | medium    | irrigation | n/a        | 34   | 25   | 5.1  | 2.2  | huang et al |        |
| leachate | ground | short | rototiller | china   | arid    | wheat | organic    | medium    | irrigation | n/a        | 10   | 5    | 1.7  | 0.5  | huang et al |        |
| leachate | ground | short | rototiller | china   | arid    | wheat | organic    | medium    | irrigation | n/a        | 75   | 55   | 17.2 | 8.6  | huang et al |        |

| leachate | ground  | short | rototiller | china         | arid     | wheat | inorganic | medium | irrigation                              |        |       |      |      |      |                  |
|----------|---------|-------|------------|---------------|----------|-------|-----------|--------|-----------------------------------------|--------|-------|------|------|------|------------------|
| leachate | ground  | short | rototiller | china         | arid     | wheat | inorganic | medium | irrigation                              | n/a    | 37.5  | 30   | 27.6 | 13.7 | huang et al      |
| leachate | ground  | short | rototiller | china         | arid     | wheat | organic   | medium | irrigation                              | n/a    | 12.5  | 10   | 10.4 | 8.1  | huang et al      |
| leachate | ground  | short | rototiller | china         | arid     | wheat | organic   | medium | irrigation                              | n/a    | 60    | 50   | 47.3 | 34.7 | huang et al      |
| leachate | ground  | short | chisel     | wisconsin USA | non-arid | corn  | inorganic | medium | 450                                     | dry    | 23    | 28.9 | 5    | 10   | brye et al       |
| leachate | ground  | short | chisel     | wisconsin USA | non-arid | corn  | inorganic | medium | 433                                     | dry    | 11.25 | 5.25 | 40   | 32   | brye et al       |
| leachate | ground  | short | chisel     | wisconsin USA | non-arid | corn  | inorganic | medium | 480.1                                   | normal | 8.07  | 4.85 | 5    | 10   | brye et al       |
| leachate | surface | med   | Disking    | nebraska USA  | arid     | corn  | organic   | medium | rain simulator at 64 mm/hour for 1 hour | n/a    | 26.6  | 22.4 |      |      | eghball & gilley |
| leachate | surface | med   | Disking    | nebraska USA  | arid     | corn  | organic   | medium | rain simulator at 64 mm/hour for 1 hour | n/a    | 47.2  | 26.9 |      |      | eghball & gilley |
| runoff   | surface | med   | Disking    | nebraska USA  | arid     | corn  | inorganic | medium | rain simulator at 64 mm/hour for 1 hour | n/a    | 24.9  | 28.6 |      |      | eghball & gilley |
| runoff   | surface | med   | Disking    | nebraska USA  | arid     | corn  | none      | medium | rain simulator at 64 mm/hour for 1 hour | n/a    | 22.8  | 24.7 |      |      | eghball & gilley |
| runoff   | surface | med   | Disking    | nebraska USA  | arid     | corn  | organic   | medium | rain simulator at 64 mm/hour for 2 hour | n/a    | 22.6  | 23.3 |      |      | eghball & gilley |
| runoff   | surface | med   | Disking    | nebraska USA  | arid     | corn  | organic   | medium | rain simulator at 64 mm/hour for 2 hour | n/a    | 26.5  | 20.7 |      |      | eghball & gilley |
| runoff   | surface | med   | Disking    | nebraska USA  | arid     | corn  | inorganic | medium | rain simulator at 64 mm/hour for 2 hour | n/a    | 35.8  | 25   |      |      | eghball & gilley |

| runoff | surface | med   | Disk-ing | nebraska USA  | arid     | corn | none       | medi um | rain simulator at 64 mm/hour for 2 hour |     |                | n/a    | 23.7 | 23.3  | eghball & gilley |               |
|--------|---------|-------|----------|---------------|----------|------|------------|---------|-----------------------------------------|-----|----------------|--------|------|-------|------------------|---------------|
| runoff | surface | med   | Disk-ing | nebraska USA  | arid     | corn | n/a        | medi um | rain simulator at 64 mm/hour for 1 hour |     |                | n/a    | 27   | 46.8  | eghball & gilley |               |
| runoff | surface | med   | Disk-ing | nebraska USA  | arid     | corn | n/a        | medi um | rain simulator at 64 mm/hour for 2 hour |     |                | n/a    | 23.3 | 23.8  | eghball & gilley |               |
| runoff | surface | short | Disk-ing | iowa USA      | non-arid | corn | organ ic   | fine    | rain simulator at 64 mm/hour for 1 hour |     |                | n/a    | 27.1 | 26.8  | eghball et al    |               |
| runoff | surface | short | Disk-ing | iowa USA      | non-arid | corn | organ ic   | fine    | rain simulator at 64 mm/hour for 1 hour |     |                | n/a    | 26   | 25.6  | eghball et al    |               |
| runoff | surface | short | Disk-ing | iowa USA      | non-arid | corn | inorg anic | fine    | rain simulator at 64 mm/hour for 1 hour |     |                | n/a    | 30.6 | 30.2  | eghball et al    |               |
| runoff | surface | short | Disk-ing | iowa USA      | non-arid | corn | inorg anic | fine    | rain simulator at 64 mm/hour for 1 hour |     |                | n/a    | 31.2 | 23.9  | eghball et al    |               |
| runoff | surface | short | Disk-ing | iowa USA      | non-arid | corn | none       | fine    | rain simulator at 64 mm/hour for 1 hour |     |                | n/a    | 27.1 | 18.5  | eghball et al    |               |
| runoff | surface | short | Disk-ing | iowa USA      | non-arid | corn | none       | fine    | rain simulator at 64 mm/hour for 1 hour |     |                | n/a    | 26   | 19.6  | eghball et al    |               |
| runoff | surface | short | Disk-ing | iowa USA      | non-arid | corn | n/a        | fine    | rain simulator at 64 mm/hour for 1 hour |     |                | n/a    |      | 0.052 | 0.604            | eghball et al |
| runoff | surface | short | Disk-ing | iowa USA      | non-arid | corn | n/a        | fine    | rain simulator at 64 mm/hour for 1 hour |     |                | n/a    |      | 2.641 | 4.447            | eghball et al |
| runoff | ground  | short | Disk-ing | ames Iowa USA | non-arid | corn | inorg anic | medi um | 766                                     | 813 | growing season | normal | 12.5 | 9     | al-kaisi & litch |               |
| runoff | ground  | short | chisel   | ames Iowa USA | non-arid | corn | inorg anic | medi um | 766                                     | 813 | growing season | normal | 12.5 | 15    | al-kaisi & litch |               |

| Study    | Soil Type | Depth | Method            | Location        | Climate  | Crop    | Organic   | Humus  | Yield (t/ha) | Yield (t/ha) | Season         | Moisture | Yield (t/ha) | Yield (t/ha) | Reference        |
|----------|-----------|-------|-------------------|-----------------|----------|---------|-----------|--------|--------------|--------------|----------------|----------|--------------|--------------|------------------|
| leachate | ground    | short | chisel            | ames lowa USA   | non-arid | soybean | none      | medium | 713          | 813          | growing season | dry      | 7.5          | 12.5         | al-kaisi & litch |
| leachate | ground    | short | chisel            | ames lowa USA   | non-arid | soybean | none      | medium | 713          | 813          | growing season | dry      | 7.5          | 10.625       | al-kaisi & litch |
| leachate | ground    | short | chisel            | nashua lowa USA | non-arid | corn    | inorganic | medium | 832          | 864          | growing season | normal   | 10           | 17.5         | al-kaisi & litch |
| leachate | ground    | short | chisel            | nashua lowa USA | non-arid | corn    | inorganic | medium | 832          | 864          | growing season | normal   | 10           | 11           | al-kaisi & litch |
| leachate | ground    | short | chisel            | nashua lowa USA | non-arid | soybean | none      | medium | 711          | 864          | growing season | dry      | 15           | 17           | al-kaisi & litch |
| leachate | ground    | short | chisel            | nashua lowa USA | non-arid | soybean | none      | medium | 711          | 864          | growing season | dry      | 15           | 20           | al-kaisi & litch |
| leachate | ground    | short | chisel & disk-ing | kentucky USA    | non-arid | corn    | organic   | medium | 1016         | 1148         | annual         | dry      | 6.77         | 6.63         | stoddard et al   |
| leachate | ground    | short | chisel & disk-ing | kentucky USA    | non-arid | corn    | organic   | medium | 1269         | 1148         | annual         | wet      | 6.425        | 5.207        | stoddard et al   |
| leachate | ground    | short | chisel & disk-ing | kentucky USA    | non-arid | corn    | organic   | medium | 1150         | 1148         | annual         | normal   | 11.125       | 9.325        | stoddard et al   |
| leachate | ground    | short | chisel & disk-ing | kentucky USA    | non-arid | corn    | organic   | medium | 1029         | 1148         | annual         | dry      | 18.4         | 14.5         | stoddard et al   |

| Model   | Depth   | Duration | Tillage           | Region           | Climate  | Crop    | Soil Type | Soil Depth | Input Data     | Output Data | Model  | Inputs | Outputs | Inputs | Outputs | Reference    |              |
|---------|---------|----------|-------------------|------------------|----------|---------|-----------|------------|----------------|-------------|--------|--------|---------|--------|---------|--------------|--------------|
|         |         |          |                   |                  |          |         |           |            |                |             |        |        |         |        |         |              | Inputs       |
| leachat | ground  | short    | chisel & disk-ing | pennsylvania USA | non-arid | corn    | inorganic | medium     | n/a            | n/a         | n/a    | 3.8    | 1.7     | 23     | 11      | zhu et al    |              |
| leachat | ground  | short    | chisel & disk-ing | pennsylvania USA | non-arid | corn    | inorganic | medium     | n/a            | n/a         | n/a    | 9      | 7.4     | 49     | 45      | zhu et al    |              |
| leachat | ground  | short    | chisel & disk-ing | pennsylvania USA | non-arid | corn    | inorganic | medium     | n/a            | n/a         | n/a    | 22.2   | 24.7    | 121    | 140     | zhu et al    |              |
| leachat | ground  | short    | chisel & disk-ing | pennsylvania USA | non-arid | soybean | none      | medium     | n/a            | n/a         | n/a    | 5.3    | 6.8     | 18     | 23      | zhu et al    |              |
| leachat | ground  | short    | chisel & disk-ing | pennsylvania USA | non-arid | soybean | none      | medium     | n/a            | n/a         | n/a    | 9.1    | 7.4     | 30     | 31      | zhu et al    |              |
| leachat | ground  | short    | chisel & disk-ing | pennsylvania USA | non-arid | soybean | none      | medium     | n/a            | n/a         | n/a    | 22.7   | 29.8    | 34     | 96      | zhu et al    |              |
| leachat | ground  | long     | Disk-ing          | nebraska USA     | non-arid | wheat   | organic   | medium     | rain simulator | n/a         | n/a    | 8.08   | 11.49   |        |         | gilley et al |              |
| leachat | ground  | med      | Disk-ing          | nebraska USA     | non-arid | wheat   | organic   | medium     | rain simulator | n/a         | n/a    | 11.33  | 16      |        |         | gilley et al |              |
| runoff  | surface | long     | chisel            | iowa USA         | non-arid | corn    | inorganic | medium     | 1030           | 840         | annual | wet    | 9.4     | 11.4   | 25      | 32           | bakhsh et al |

| Detailed Data for Runoff and Drainage |               |                 |                 |          |          |         |           |            |                    |                        |           |               |             | Summary Statistics |           |               |              |               |           |               |             |               |           |               |             |               |           |               |
|---------------------------------------|---------------|-----------------|-----------------|----------|----------|---------|-----------|------------|--------------------|------------------------|-----------|---------------|-------------|--------------------|-----------|---------------|--------------|---------------|-----------|---------------|-------------|---------------|-----------|---------------|-------------|---------------|-----------|---------------|
| Runoff Type                           | Drainage Type | Drainage Length | Drainage Method | Location | Climate  | Crop    | Soil Type | Soil Depth | Runoff Volume (mm) | Drainage Capacity (mm) | Frequency | Soil Moisture | Runoff (mm) | Drainage (mm)      | Frequency | Soil Moisture | Runoff (mm)  | Drainage (mm) | Frequency | Soil Moisture | Runoff (mm) | Drainage (mm) | Frequency | Soil Moisture | Runoff (mm) | Drainage (mm) | Frequency | Soil Moisture |
| runoff                                | surface       | long            | chisel          | iowa USA | non-arid | corn    | inorganic | medium     | 750                | 840                    | annual    | dry           | 8.1         | 8.8                | 5         | 9             | bakhsh et al |               |           |               |             |               |           |               |             |               |           |               |
| drain water                           | ground        | long            | chisel          | iowa USA | non-arid | corn    | inorganic | medium     | 800                | 840                    | annual    | normal        | 10.9        | 13.5               | 10        | 12            | bakhsh et al |               |           |               |             |               |           |               |             |               |           |               |
| drain water                           | ground        | long            | chisel          | iowa USA | non-arid | corn    | inorganic | medium     | 680                | 840                    | annual    | dry           | 15.3        | 13.9               | 8         | 8             | bakhsh et al |               |           |               |             |               |           |               |             |               |           |               |
| drain water                           | ground        | long            | chisel          | iowa USA | non-arid | corn    | inorganic | medium     | 750                | 840                    | annual    | dry           | 12.6        | 10.5               | 7         | 7             | bakhsh et al |               |           |               |             |               |           |               |             |               |           |               |
| drain water                           | ground        | long            | chisel          | iowa USA | non-arid | corn    | inorganic | medium     | 980                | 840                    | annual    | wet           | 11.8        | 12.1               | 24        | 34            | bakhsh et al |               |           |               |             |               |           |               |             |               |           |               |
| drain water                           | ground        | long            | chisel          | iowa USA | non-arid | corn    | inorganic | medium     | 1030               | 840                    | annual    | wet           | 9.3         | 9.3                | 46        | 33            | bakhsh et al |               |           |               |             |               |           |               |             |               |           |               |
| drain water                           | ground        | long            | chisel          | iowa USA | non-arid | corn    | inorganic | medium     | 750                | 840                    | annual    | dry           | 6.3         | 9.3                | 10        | 3             | bakhsh et al |               |           |               |             |               |           |               |             |               |           |               |
| drain water                           | ground        | long            | chisel          | iowa USA | non-arid | corn    | inorganic | medium     | 800                | 840                    | annual    | normal        | 12.7        | 15.5               | 25        | 10            | bakhsh et al |               |           |               |             |               |           |               |             |               |           |               |
| drain water                           | ground        | long            | chisel          | iowa USA | non-arid | corn    | inorganic | medium     | 680                | 840                    | annual    | dry           | 12.8        | 13                 | 14        | 6             | bakhsh et al |               |           |               |             |               |           |               |             |               |           |               |
| drain water                           | ground        | long            | chisel          | iowa USA | non-arid | corn    | inorganic | medium     | 750                | 840                    | annual    | dry           | 12.3        | 12.4               | 17        | 6             | bakhsh et al |               |           |               |             |               |           |               |             |               |           |               |
| drain water                           | ground        | long            | chisel          | iowa USA | non-arid | corn    | inorganic | medium     | 980                | 840                    | annual    | wet           | 10.9        | 12.7               | 40        | 24            | bakhsh et al |               |           |               |             |               |           |               |             |               |           |               |
| drain water                           | ground        | long            | chisel          | iowa USA | non-arid | soybean | none      | medium     | 1030               | 840                    | annual    | wet           | 5.9         | 6.3                | 23        | 30            | bakhsh et al |               |           |               |             |               |           |               |             |               |           |               |
| drain water                           | ground        | long            | chisel          | iowa USA | non-arid | soybean | none      | medium     | 750                | 840                    | annual    | dry           | 4.6         | 6.7                | 3         | 5             | bakhsh et al |               |           |               |             |               |           |               |             |               |           |               |

| Drainage System Performance and Environmental Impact |           |                 |                 |          |          |         |            |        |      |     |                |        |        | Soil Health and Nutrient Management |       |                     |    | Water Quality |     | Economic Viability |     | Environmental Sustainability |     | Research and References |     |     |     |                                               |
|------------------------------------------------------|-----------|-----------------|-----------------|----------|----------|---------|------------|--------|------|-----|----------------|--------|--------|-------------------------------------|-------|---------------------|----|---------------|-----|--------------------|-----|------------------------------|-----|-------------------------|-----|-----|-----|-----------------------------------------------|
| Drainage Type                                        | Soil Type | Drainage Length | Drainage Method | Location | Climate  | Crop    | Fertilizer | pH     | EC   | N   | P              | K      | Sulfur | Soil Health                         |       | Nutrient Management |    | Water Quality |     | Economic Viability |     | Environmental Sustainability |     | Research and References |     |     |     |                                               |
|                                                      |           |                 |                 |          |          |         |            |        |      |     |                |        |        | OM                                  | Water | OM                  | N  | EC            | SO4 | NO3                | NO3 | NO3                          | NO3 | NO3                     | NO3 | NO3 | NO3 | NO3                                           |
| drain water                                          | ground    | long            | chisel          | iowa USA | non-arid | soybean | none       | medium | 800  | 840 | annual         | normal |        | 8.5                                 | 10.3  | 9                   | 18 | 18            | 18  | 18                 | 18  | 18                           | 18  | 18                      | 18  | 18  | 18  | bakhsh et al                                  |
| drain water                                          | ground    | long            | chisel          | iowa USA | non-arid | soybean | none       | medium | 680  | 840 | annual         | dry    |        | 15.7                                | 12.9  | 8                   | 6  | 6             | 6   | 6                  | 6   | 6                            | 6   | 6                       | 6   | 6   | 6   | bakhsh et al                                  |
| drain water                                          | ground    | long            | chisel          | iowa USA | non-arid | soybean | none       | medium | 750  | 840 | annual         | dry    |        | 7.9                                 | 7.6   | 6                   | 11 | 11            | 11  | 11                 | 11  | 11                           | 11  | 11                      | 11  | 11  | 11  | bakhsh et al                                  |
| drain water                                          | ground    | long            | chisel          | iowa USA | non-arid | soybean | none       | medium | 980  | 840 | annual         | wet    |        | 11.8                                | 11.1  | 23                  | 23 | 23            | 23  | 23                 | 23  | 23                           | 23  | 23                      | 23  | 23  | 23  | bakhsh et al                                  |
| drain water                                          | ground    | long            | chisel          | iowa USA | non-arid | soybean | none       | medium | 1030 | 840 | annual         | wet    |        | 6.5                                 | 11.5  | 37                  | 23 | 23            | 23  | 23                 | 23  | 23                           | 23  | 23                      | 23  | 23  | 23  | bakhsh et al                                  |
| drain water                                          | ground    | long            | chisel          | iowa USA | non-arid | soybean | none       | medium | 750  | 840 | annual         | dry    |        | 4.8                                 | 6.2   | 6                   | 3  | 3             | 3   | 3                  | 3   | 3                            | 3   | 3                       | 3   | 3   | 3   | bakhsh et al                                  |
| drain water                                          | ground    | long            | chisel          | iowa USA | non-arid | soybean | none       | medium | 800  | 840 | annual         | normal |        | 9                                   | 10.9  | 23                  | 10 | 10            | 10  | 10                 | 10  | 10                           | 10  | 10                      | 10  | 10  | 10  | bakhsh et al                                  |
| drain water                                          | ground    | long            | chisel          | iowa USA | non-arid | soybean | none       | medium | 680  | 840 | annual         | dry    |        | 12.4                                | 15.1  | 13                  | 6  | 6             | 6   | 6                  | 6   | 6                            | 6   | 6                       | 6   | 6   | 6   | bakhsh et al                                  |
| drain water                                          | ground    | long            | chisel          | iowa USA | non-arid | soybean | none       | medium | 750  | 840 | annual         | dry    |        | 7.3                                 | 6.8   | 16                  | 4  | 4             | 4   | 4                  | 4   | 4                            | 4   | 4                       | 4   | 4   | 4   | bakhsh et al                                  |
| drain water                                          | ground    | long            | chisel          | iowa USA | non-arid | soybean | none       | medium | 980  | 840 | annual         | wet    |        | 9.7                                 | 11.9  | 26                  | 24 | 24            | 24  | 24                 | 24  | 24                           | 24  | 24                      | 24  | 24  | 24  | bakhsh et al                                  |
| drain water                                          | ground    | long            | chisel          | iowa USA | non-arid | corn    | inorganic  | medium | 1141 | 758 | growing season | wet    |        | 39.00                               | 54    | 96                  | 89 | 89            | 89  | 89                 | 89  | 89                           | 89  | 89                      | 89  | 89  | 89  | kanwar et al; bakhsh & kanwar; singh & kanwar |
| drain water                                          | ground    | long            | chisel          | iowa USA | non-arid | corn    | inorganic  | medium | 892  | 758 | growing season | wet    |        | 19.00                               | 28    | 56                  | 68 | 68            | 68  | 68                 | 68  | 68                           | 68  | 68                      | 68  | 68  | 68  | kanwar et al; bakhsh & kanwar; singh & kanwar |



| Detailed Analysis of Agricultural Practices and Environmental Impacts |                 |              |                   |          |           |               |                 |                |                           |               |                |                     |                                       | Key Performance Indicators (KPIs) |                   |               |                                              |
|-----------------------------------------------------------------------|-----------------|--------------|-------------------|----------|-----------|---------------|-----------------|----------------|---------------------------|---------------|----------------|---------------------|---------------------------------------|-----------------------------------|-------------------|---------------|----------------------------------------------|
| Crop Type                                                             | Drainage Method | Tillage Type | Irrigation System | Region   | Soil Type | Crop Rotation | Fertilizer Type | Nutrient Level | Yield and Quality Metrics |               |                |                     | Environmental and Economic Indicators |                                   |                   |               |                                              |
|                                                                       |                 |              |                   |          |           |               |                 |                | Yield (kg/ha)             | Quality Score | Water Use (mm) | Energy Use (kWh/ha) | CO2 Emissions (kg/ha)                 | Water Quality Index               | Soil Health Index | Cost (USD/ha) | Profit (USD/ha)                              |
| drain water                                                           | ground          | long         | chisel            | iowa USA | non-arid  | corn          | inorganic       | medium         | 741                       | 758           | growing season | normal              | 11.00                                 | 15                                | 18                | 17            | kanwar et al; baksh & kanwar; singh & kanwar |
| drain water                                                           | ground          | long         | chisel            | iowa USA | non-arid  | corn          | inorganic       | medium         | 1141                      | 758           | growing season | wet                 | 23.00                                 | 28                                | 33                | 47            | kanwar et al; baksh & kanwar; singh & kanwar |
| drain water                                                           | ground          | long         | chisel            | iowa USA | non-arid  | corn          | inorganic       | medium         | 892                       | 758           | growing season | wet                 | 17.00                                 | 21                                | 27                | 33            | kanwar et al; baksh & kanwar; singh & kanwar |
| drain water                                                           | ground          | long         | chisel            | iowa USA | non-arid  | corn          | inorganic       | medium         | 741                       | 758           | growing season | normal              | 8.00                                  | 10                                | 4                 | 15            | kanwar et al; baksh & kanwar; singh & kanwar |
| drain water                                                           | ground          | long         | chisel            | iowa USA | non-arid  | soybean       | none            | medium         | 1141                      | 758           | growing season | wet                 | 22.00                                 | 33                                | 33                | 46            | kanwar et al; baksh & kanwar; singh & kanwar |
| drain water                                                           | ground          | long         | chisel            | iowa USA | non-arid  | soybean       | none            | medium         | 892                       | 758           | growing season | wet                 | 11.00                                 | 15                                | 29                | 41            | kanwar et al; baksh & kanwar; singh & kanwar |
| drain water                                                           | ground          | long         | chisel            | iowa USA | non-arid  | soybean       | none            | medium         | 741                       | 758           | growing season | normal              | 9.00                                  | 12                                | 4                 | 7             | kanwar et al; baksh & kanwar; singh & kanwar |
| drain water                                                           | ground          | long         | chisel            | iowa USA | non-arid  | corn          | inorganic       | medium         | 1141                      | 758           | growing season | wet                 | 39.00                                 | 44                                | 96                | 75            | kanwar et al; baksh & kanwar; singh & kanwar |
| drain water                                                           | ground          | long         | chisel            | iowa USA | non-arid  | corn          | inorganic       | medium         | 892                       | 758           | growing season | wet                 | 19.00                                 | 21                                | 56                | 56            | kanwar et al; baksh & kanwar; singh & kanwar |

| Detailed Crop Management and Environmental Data |           |          |         |          |          |         |           |            |            |               |                |              |         | Key Performance Indicators (KPIs) |        |                |                                              |            |
|-------------------------------------------------|-----------|----------|---------|----------|----------|---------|-----------|------------|------------|---------------|----------------|--------------|---------|-----------------------------------|--------|----------------|----------------------------------------------|------------|
| Crop Type                                       | Soil Type | Drainage | Tillage | Region   | Climate  | Crop    | Nutrient  | Fertilizer | Irrigation | Yield (kg/ha) | Water Use (mm) | Growth Stage | Weather | Efficiency                        |        | Sustainability |                                              | References |
|                                                 |           |          |         |          |          |         |           |            |            |               |                |              |         | Input                             | Output | Score          | Index                                        |            |
| drain water                                     | ground    | long     | chisel  | iowa USA | non-arid | corn    | inorganic | medium     | 741        | 758           | growing season | normal       | 11.00   | 11                                | 18     | 10             | kanwar et al; baksh & kanwar; singh & kanwar |            |
| drain water                                     | ground    | long     | chisel  | iowa USA | non-arid | corn    | inorganic | medium     | 1141       | 758           | growing season | wet          | 23.00   | 22                                | 33     | 27             | kanwar et al; baksh & kanwar; singh & kanwar |            |
| drain water                                     | ground    | long     | chisel  | iowa USA | non-arid | corn    | inorganic | medium     | 892        | 758           | growing season | wet          | 17.00   | 18                                | 27     | 26             | kanwar et al; baksh & kanwar; singh & kanwar |            |
| drain water                                     | ground    | long     | chisel  | iowa USA | non-arid | corn    | inorganic | medium     | 741        | 758           | growing season | normal       | 8.00    | 10                                | 4      | 11             | kanwar et al; baksh & kanwar; singh & kanwar |            |
| drain water                                     | ground    | long     | chisel  | iowa USA | non-arid | soybean | none      | medium     | 1141       | 758           | growing season | wet          | 22.00   | 24                                | 33     | 30             | kanwar et al; baksh & kanwar; singh & kanwar |            |
| drain water                                     | ground    | long     | chisel  | iowa USA | non-arid | soybean | none      | medium     | 892        | 758           | growing season | wet          | 11.00   | 12                                | 29     | 29             | kanwar et al; baksh & kanwar; singh & kanwar |            |
| drain water                                     | ground    | long     | chisel  | iowa USA | non-arid | soybean | none      | medium     | 741        | 758           | growing season | normal       | 9.00    | 11                                | 4      | 9              | kanwar et al; baksh & kanwar; singh & kanwar |            |
| drain water                                     | ground    | long     | chisel  | iowa USA | non-arid | corn    | inorganic | medium     | 1030       | 840           | annual         | wet          | 9.30    | 9.3                               | 45.8   | 32.8           | bakhsh & kanwar                              |            |
| drain water                                     | ground    | long     | chisel  | iowa USA | non-arid | corn    | inorganic | medium     | 750        | 840           | annual         | dry          | 8.20    | 9.3                               | 13.5   | 2.7            | bakhsh & kanwar                              |            |
| drain water                                     | ground    | long     | chisel  | iowa USA | non-arid | corn    | inorganic | medium     | 800        | 840           | annual         | normal       | 12.70   | 15.5                              | 25.2   | 10.5           | bakhsh & kanwar                              |            |

| Drainage System Characteristics |                 |                 |                   |          |          |         |            |                  |               |                |                    |                   |                      | Soil Properties |         |         |                                 |                                       | Crop & Management |                    |                     |               |                 |                |             |           |             |                |           |            |                 |               |              |           |              |               |             |             |               |                |           |             |           |            |                 |               |              |           |              |               |             |             |               |
|---------------------------------|-----------------|-----------------|-------------------|----------|----------|---------|------------|------------------|---------------|----------------|--------------------|-------------------|----------------------|-----------------|---------|---------|---------------------------------|---------------------------------------|-------------------|--------------------|---------------------|---------------|-----------------|----------------|-------------|-----------|-------------|----------------|-----------|------------|-----------------|---------------|--------------|-----------|--------------|---------------|-------------|-------------|---------------|----------------|-----------|-------------|-----------|------------|-----------------|---------------|--------------|-----------|--------------|---------------|-------------|-------------|---------------|
| Drainage Type                   | Drainage Method | Drainage Length | Drainage Material | Location | Climate  | Crop    | Fertilizer | Planting Density | Planting Date | Planting Depth | Planting Frequency | Planting Moisture | Planting Temperature | Soil Type       | Soil pH | Soil EC | Soil Salinity                   | Soil Saturated Hydraulic Conductivity | Soil Bulk Density | Soil Water Content | Soil Organic Carbon | Soil Nitrogen | Soil Phosphorus | Soil Potassium | Soil Sulfur | Soil Zinc | Soil Copper | Soil Manganese | Soil Iron | Soil Boron | Soil Molybdenum | Soil Selenium | Soil Cadmium | Soil Lead | Soil Arsenic | Soil Chromium | Soil Nickel | Soil Cobalt | Soil Vanadium | Soil Manganese | Soil Zinc | Soil Copper | Soil Iron | Soil Boron | Soil Molybdenum | Soil Selenium | Soil Cadmium | Soil Lead | Soil Arsenic | Soil Chromium | Soil Nickel | Soil Cobalt | Soil Vanadium |
| drain water                     | ground          | long            | chisel            | iowa USA | non-arid | corn    | inorganic  | medium           | 680           | 840            | annual             | dry               | 12.80                | 13              | 13.7    | 6.3     | bakhsh & kanwar                 |                                       |                   |                    |                     |               |                 |                |             |           |             |                |           |            |                 |               |              |           |              |               |             |             |               |                |           |             |           |            |                 |               |              |           |              |               |             |             |               |
| drain water                     | ground          | long            | chisel            | iowa USA | non-arid | corn    | inorganic  | medium           | 750           | 840            | annual             | dry               | 12.30                | 12.4            | 16.6    | 6.3     | bakhsh & kanwar                 |                                       |                   |                    |                     |               |                 |                |             |           |             |                |           |            |                 |               |              |           |              |               |             |             |               |                |           |             |           |            |                 |               |              |           |              |               |             |             |               |
| drain water                     | ground          | long            | chisel            | iowa USA | non-arid | corn    | inorganic  | medium           | 980           | 840            | annual             | wet               | 10.90                | 12.7            | 39.7    | 23.6    | bakhsh & kanwar                 |                                       |                   |                    |                     |               |                 |                |             |           |             |                |           |            |                 |               |              |           |              |               |             |             |               |                |           |             |           |            |                 |               |              |           |              |               |             |             |               |
| drain water                     | ground          | long            | chisel            | iowa USA | non-arid | soybean | none       | medium           | 1030          | 840            | annual             | wet               | 6.50                 | 11.5            | 37.1    | 32.3    | bakhsh & kanwar                 |                                       |                   |                    |                     |               |                 |                |             |           |             |                |           |            |                 |               |              |           |              |               |             |             |               |                |           |             |           |            |                 |               |              |           |              |               |             |             |               |
| drain water                     | ground          | long            | chisel            | iowa USA | non-arid | soybean | none       | medium           | 750           | 840            | annual             | dry               | 4.80                 | 6.2             | 5.6     | 3.4     | bakhsh & kanwar                 |                                       |                   |                    |                     |               |                 |                |             |           |             |                |           |            |                 |               |              |           |              |               |             |             |               |                |           |             |           |            |                 |               |              |           |              |               |             |             |               |
| drain water                     | ground          | long            | chisel            | iowa USA | non-arid | soybean | none       | medium           | 800           | 840            | annual             | normal            | 9.00                 | 10.9            | 23.1    | 10.2    | bakhsh & kanwar                 |                                       |                   |                    |                     |               |                 |                |             |           |             |                |           |            |                 |               |              |           |              |               |             |             |               |                |           |             |           |            |                 |               |              |           |              |               |             |             |               |
| drain water                     | ground          | long            | chisel            | iowa USA | non-arid | soybean | none       | medium           | 680           | 840            | annual             | dry               | 12.40                | 15.1            | 12.9    | 5.7     | bakhsh & kanwar                 |                                       |                   |                    |                     |               |                 |                |             |           |             |                |           |            |                 |               |              |           |              |               |             |             |               |                |           |             |           |            |                 |               |              |           |              |               |             |             |               |
| drain water                     | ground          | long            | chisel            | iowa USA | non-arid | soybean | none       | medium           | 750           | 840            | annual             | dry               | 7.30                 | 6.8             | 15.7    | 3.7     | bakhsh & kanwar                 |                                       |                   |                    |                     |               |                 |                |             |           |             |                |           |            |                 |               |              |           |              |               |             |             |               |                |           |             |           |            |                 |               |              |           |              |               |             |             |               |
| drain water                     | ground          | long            | chisel            | iowa USA | non-arid | soybean | none       | medium           | 980           | 840            | annual             | wet               | 9.70                 | 11.9            | 25.9    | 24.5    | bakhsh & kanwar                 |                                       |                   |                    |                     |               |                 |                |             |           |             |                |           |            |                 |               |              |           |              |               |             |             |               |                |           |             |           |            |                 |               |              |           |              |               |             |             |               |
| drain water                     | ground          | long            | chisel            | iowa USA | non-arid | corn    | inorganic  | medium           | 1041          | 906            | annual             | wet               | 39.04                | 54.61           | 107.19  | 99.92   | weed & kanwar; bjorneberg et al |                                       |                   |                    |                     |               |                 |                |             |           |             |                |           |            |                 |               |              |           |              |               |             |             |               |                |           |             |           |            |                 |               |              |           |              |               |             |             |               |
| drain water                     | ground          | long            | chisel            | iowa USA | non-arid | corn    | inorganic  | medium           | 965           | 906            | annual             | normal            | 18.61                | 27.98           | 62.46   | 76.06   | weed & kanwar; bjorneberg et al |                                       |                   |                    |                     |               |                 |                |             |           |             |                |           |            |                 |               |              |           |              |               |             |             |               |                |           |             |           |            |                 |               |              |           |              |               |             |             |               |
| drain water                     | ground          | long            | chisel            | iowa USA | non-arid | corn    | inorganic  | medium           | 744           | 906            | annual             | dry               | 8.08                 | 10.49           | 11.72   | 13.43   | weed & kanwar; bjorneberg et al |                                       |                   |                    |                     |               |                 |                |             |           |             |                |           |            |                 |               |              |           |              |               |             |             |               |                |           |             |           |            |                 |               |              |           |              |               |             |             |               |
| drain water                     | ground          | long            | chisel            | iowa USA | non-arid | corn    | inorganic  | medium           | 1041          | 906            | annual             | wet               | 18.68                | 32.67           | 31.63   | 51.16   | weed & kanwar; bjorneberg et al |                                       |                   |                    |                     |               |                 |                |             |           |             |                |           |            |                 |               |              |           |              |               |             |             |               |                |           |             |           |            |                 |               |              |           |              |               |             |             |               |

| Detailed Crop Management Parameters |           |          |         |          |          |         |           |            |            |         |              |               |            | Key Performance Indicators (KPIs) |                |                         |                                 | Reference |
|-------------------------------------|-----------|----------|---------|----------|----------|---------|-----------|------------|------------|---------|--------------|---------------|------------|-----------------------------------|----------------|-------------------------|---------------------------------|-----------|
| Crop Type                           | Soil Type | Drainage | Tillage | Region   | Climate  | Crop    | Nutrient  | Fertilizer | Irrigation | Harvest | Yield (t/ha) | Quality Index | Risk Level | Efficiency                        |                | Sustainability          |                                 | Source    |
|                                     |           |          |         |          |          |         |           |            |            |         |              |               |            | Water Use (mm)                    | Energy (MJ/ha) | Carbon Footprint (t/ha) | Soil Health Index               |           |
| drain water                         | ground    | long     | chisel  | iowa USA | non-arid | corn    | inorganic | medium     | 965        | 906     | annual       | normal        | 17.07      | 20.59                             | 30.64          | 36.49                   | weed & kanwar; bjerneberg et al |           |
| drain water                         | ground    | long     | chisel  | iowa USA | non-arid | corn    | inorganic | medium     | 744        | 906     | annual       | dry           | 7.56       | 27.08                             | 3.65           | 4.86                    | weed & kanwar; bjerneberg et al |           |
| drain water                         | ground    | long     | chisel  | iowa USA | non-arid | soybean | none      | medium     | 1041       | 906     | annual       | wet           | 23.04      | 14.49                             | 36.47          | 52.36                   | weed & kanwar; bjerneberg et al |           |
| drain water                         | ground    | long     | chisel  | iowa USA | non-arid | soybean | none      | medium     | 965        | 906     | annual       | normal        | 11.20      | 7.08                              | 32.11          | 46.15                   | weed & kanwar; bjerneberg et al |           |
| drain water                         | ground    | long     | chisel  | iowa USA | non-arid | soybean | none      | medium     | 744        | 906     | annual       | dry           | 6.11       | 6.99                              | 3.61           | 11.71                   | weed & kanwar; bjerneberg et al |           |
| drain water                         | ground    | long     | chisel  | iowa USA | non-arid | corn    | inorganic | medium     | 1041       | 906     | annual       | wet           | 39.04      | 83.41                             | 107.19         | 43.61                   | weed & kanwar; bjerneberg et al |           |
| drain water                         | ground    | long     | chisel  | iowa USA | non-arid | corn    | inorganic | medium     | 965        | 906     | annual       | normal        | 18.61      | 67.59                             | 62.46          | 20.72                   | weed & kanwar; bjerneberg et al |           |
| drain water                         | ground    | long     | chisel  | iowa USA | non-arid | corn    | inorganic | medium     | 744        | 906     | annual       | dry           | 8.08       | 0.89                              | 11.72          | 0.86                    | weed & kanwar; bjerneberg et al |           |
| drain water                         | ground    | long     | chisel  | iowa USA | non-arid | corn    | inorganic | medium     | 1041       | 906     | annual       | wet           | 18.68      | 33.94                             | 31.63          | 24.5                    | weed & kanwar; bjerneberg et al |           |
| drain water                         | ground    | long     | chisel  | iowa USA | non-arid | corn    | inorganic | medium     | 965        | 906     | annual       | normal        | 17.07      | 29.82                             | 30.64          | 18.67                   | weed & kanwar; bjerneberg et al |           |
| drain water                         | ground    | long     | chisel  | iowa USA | non-arid | corn    | inorganic | medium     | 744        | 906     | annual       | dry           | 7.56       | 2.84                              | 3.65           | 3.21                    | weed & kanwar; bjerneberg et al |           |
| drain water                         | ground    | long     | chisel  | iowa USA | non-arid | soybean | none      | medium     | 1041       | 906     | annual       | wet           | 23.04      | 30.34                             | 36.47          | 21.26                   | weed & kanwar; bjerneberg et al |           |
| drain water                         | ground    | long     | chisel  | iowa USA | non-arid | soybean | none      | medium     | 965        | 906     | annual       | normal        | 11.20      | 32.21                             | 32.11          | 11.68                   | weed & kanwar; bjerneberg et al |           |

| runoff type | soil depth | rotation length | tillage | location     | climate  | crop    | soil texture | soil type | soil depth      | rotation length | climate | soil moisture | runoff (mm) |         |            |                        | reference                       |
|-------------|------------|-----------------|---------|--------------|----------|---------|--------------|-----------|-----------------|-----------------|---------|---------------|-------------|---------|------------|------------------------|---------------------------------|
|             |            |                 |         |              |          |         |              |           |                 |                 |         |               | total       | surface | subsurface | deep                   |                                 |
| drain water | ground     | long            | chisel  | iowa USA     | non-arid | soybean | none         | medium    | 744             | 906             | annual  | dry           | 6.11        | 4.49    | 3.61       | 3.43                   | weed & kanwar; bjerneberg et al |
| runoff      | surface    | short           | chisel  | texas USA    | arid     | n/a     | inorganic    | fine      | average 3 years |                 |         | n/a           |             | 2.5     | 5.5        | chicester & richardson |                                 |
| runoff      | surface    | short           | chisel  | texas USA    | arid     | n/a     | inorganic    | fine      | average 3 years |                 |         | n/a           |             | 1.9     | 1.6        | chicester & richardson |                                 |
| runoff      | surface    | short           | chisel  | texas USA    | arid     | n/a     | inorganic    | fine      | average 3 years |                 |         | n/a           |             | 5.9     | 10.4       | chicester & richardson |                                 |
| runoff      | surface    | short           | chisel  | virginia USA | non-arid | n/a     | inorganic    | medium    | rainl simulator |                 |         | n/a           | 2.72        | 0.61    |            | mostaghimi et al       |                                 |
| runoff      | surface    | short           | chisel  | virginia USA | non-arid | n/a     | inorganic    | medium    | rainl simulator |                 |         | n/a           | 3.72        | 1.16    |            | mostaghimi et al       |                                 |
| runoff      | surface    | short           | chisel  | virginia USA | non-arid | n/a     | inorganic    | medium    | rainl simulator |                 |         | n/a           | 4.14        | 0.62    |            | mostaghimi et al       |                                 |
| runoff      | surface    | short           | chisel  | virginia USA | non-arid | n/a     | inorganic    | medium    | rainl simulator |                 |         | n/a           | 1.07        | 1.23    |            | mostaghimi et al       |                                 |
| runoff      | surface    | short           | chisel  | virginia USA | non-arid | n/a     | inorganic    | medium    | rainl simulator |                 |         | n/a           | 1.2         | 2.62    |            | mostaghimi et al       |                                 |
| runoff      | surface    | short           | chisel  | virginia USA | non-arid | n/a     | inorganic    | medium    | rainl simulator |                 |         | n/a           | 1.06        | 1.52    |            | mostaghimi et al       |                                 |
| runoff      | surface    | short           | chisel  | virginia USA | non-arid | n/a     | inorganic    | medium    | rainl simulator |                 |         | n/a           | 2           | 4.51    |            | mostaghimi et al       |                                 |
| runoff      | surface    | short           | chisel  | virginia USA | non-arid | n/a     | inorganic    | medium    | rainl simulator |                 |         | n/a           | 3.41        | 5.28    |            | mostaghimi et al       |                                 |
| runoff      | surface    | short           | chisel  | virginia USA | non-arid | n/a     | inorganic    | medium    | rainl simulator |                 |         | n/a           | 2.38        | 2.57    |            | mostaghimi et al       |                                 |

| runoff | surface | short | chisel   | kansas USA | arid     | soybean | none      | fine   | 901  | 970 | annual | normal | 0.7   | 0.9   | 1.3   | 1.1  | zeimen et al    |
|--------|---------|-------|----------|------------|----------|---------|-----------|--------|------|-----|--------|--------|-------|-------|-------|------|-----------------|
| runoff | surface | med   | chisel   | kansas USA | arid     | soybean | none      | fine   | 848  | 970 | annual | dry    | 1.1   | 2.8   | 0.5   | 1    | zeimen et al    |
| runoff | surface | short | chisel   | kansas USA | arid     | soybean | none      | fine   | 935  | 970 | annual | normal | 0.3   | 0.4   | 1     | 0.9  | zeimen et al    |
| runoff | surface | short | chisel   | kansas USA | arid     | soybean | none      | fine   | 1096 | 970 | annual | wet    | 1.3   | 1.6   | 1     | 1    | zeimen et al    |
| runoff | surface | short | chisel   | kansas USA | arid     | soybean | none      | fine   | 935  | 970 | annual | normal | 0.5   | 0.2   | 2.5   | 0.7  | zeimen et al    |
| runoff | surface | short | chisel   | kansas USA | arid     | soybean | none      | fine   | 1096 | 970 | annual | wet    | 1.1   | 1     | 1.5   | 2.2  | zeimen et al    |
| runoff | surface | short | paraplow | ohio USA   | non-arid | corn    | inorganic | medium | 828  | 965 | annual | dry    | 17.4  | 5     | 7.5   | 1.2  | owens & edwards |
| runoff | surface | short | paraplow | ohio USA   | non-arid | corn    | inorganic | medium | 940  | 965 | annual | normal | 15.45 | 15.65 | 11.05 | 9.15 | owens & edwards |
| runoff | surface | short | paraplow | ohio USA   | non-arid | corn    | inorganic | medium | 945  | 965 | annual | normal | 5     | 9.3   | 1.55  | 2.3  | owens & edwards |
| runoff | surface | short | paraplow | ohio USA   | non-arid | soybean | none      | medium | 987  | 965 | annual | normal | 2.1   | 1.55  | 1.25  | 1    | owens & edwards |
| runoff | surface | short | paraplow | ohio USA   | non-arid | soybean | none      | medium | 941  | 965 | annual | normal | 0.55  | 0.65  | 0.4   | 0.25 | owens & edwards |
| runoff | surface | med   | paraplow | ohio USA   | non-arid | soybean | none      | medium | 950  | 965 | annual | normal | 1.05  | 2.8   | 1.25  | 2.5  | owens & edwards |
| runoff | surface | short | paraplow | ohio USA   | non-arid | corn    | inorganic | medium | 828  | 965 | annual | dry    | 17.4  | 14.25 | 7.5   | 4.4  | owens & edwards |

| runoff   | surface | short | paraplow            | ohio USA      | non-arid | corn    | inorganic | medium | 940       | 965  | annual         | normal | 15.45 | 28.1 | 11.05 | 25.55 | owens & edwards |
|----------|---------|-------|---------------------|---------------|----------|---------|-----------|--------|-----------|------|----------------|--------|-------|------|-------|-------|-----------------|
| runoff   | surface | short | paraplow            | ohio USA      | non-arid | corn    | inorganic | medium | 945       | 965  | annual         | normal | 5     | 35.3 | 1.55  | 4.95  | owens & edwards |
| runoff   | surface | short | paraplow            | ohio USA      | non-arid | soybean | none      | medium | 987       | 965  | annual         | normal | 2.1   | 4.9  | 1.25  | 4.7   | owens & edwards |
| runoff   | surface | short | paraplow            | ohio USA      | non-arid | soybean | none      | medium | 941       | 965  | annual         | normal | 0.55  | 2.3  | 0.4   | 2.15  | owens & edwards |
| runoff   | surface | med   | paraplow            | ohio USA      | non-arid | soybean | none      | medium | 950       | 965  | annual         | normal | 1.05  | 2.95 | 1.25  | 3.85  | owens & edwards |
| runoff   | surface | med   | chisel              | minnesota USA | non-arid | corn    | inorganic | medium | 414 & 780 |      |                | n/a    | 56    | 81   |       |       | joshi et al     |
| runoff   | surface | med   | chisel              | minnesota USA | non-arid | corn    | organic   | medium | 414 & 780 |      |                | n/a    | 43    | 57   |       |       | joshi et al     |
| leachate | ground  | med   | chisel              | minnesota USA | non-arid | corn    | organic   | medium | 414 & 780 |      |                | n/a    | 14    | 8    |       |       | joshi et al     |
| leachate | ground  | med   | chisel              | minnesota USA | non-arid | corn    | organic   | medium | 414 & 780 |      |                | n/a    | 8     | 15   |       |       | joshi et al     |
| leachate | ground  | med   | chisel              | minnesota USA | non-arid | corn    | n/a       | medium | 414       | 581  | growing season | dry    | 28.4  | 64.5 |       |       | joshi et al     |
| leachate | ground  | med   | chisel              | minnesota USA | non-arid | corn    | n/a       | medium | 780       | 581  | growing season | wet    | 57.9  | 75.6 |       |       | joshi et al     |
| leachate | ground  | short | Disking & harrowing | nigeria       | non-arid | corn    | inorganic | coarse | 1217      | 1357 | april-oct      | dry    | 3.35  | 1.83 |       |       | lal et al       |

| runoff | leachate | soil    | depth | country | climate  | crop | soil type | depth  | 1990 | 2000 | season    | season | 1990 | 2000 | reference |
|--------|----------|---------|-------|---------|----------|------|-----------|--------|------|------|-----------|--------|------|------|-----------|
| runoff | leachate | ground  | short | nigeria | non-arid | corn | inorganic | coarse | 1890 | 1357 | april-oct | wet    | 1.84 | 1.77 | lal et al |
| runoff | runoff   | surface | short | nigeria | non-arid | corn | inorganic | coarse | 1100 | 1357 | april-oct | dry    | 2.86 | 2.48 | lal et al |
| runoff | runoff   | surface | short | nigeria | non-arid | corn | inorganic | coarse | 1500 | 1357 | april-oct | wet    | 3.78 | 1.69 | lal et al |
| runoff | runoff   | surface | short | nigeria | non-arid | corn | inorganic | coarse | 1385 | 1357 | april-oct | normal | 1.3  | 0.74 | lal et al |
| runoff | runoff   | surface | short | nigeria | non-arid | corn | inorganic | coarse | 1217 | 1357 | april-oct | dry    | 1.72 | 1.79 | lal et al |
| runoff | runoff   | surface | short | nigeria | non-arid | corn | inorganic | coarse | 1890 | 1357 | april-oct | wet    | 3.23 | 1.91 | lal et al |
| runoff | runoff   | surface | short | nigeria | non-arid | corn | inorganic | coarse | 1100 | 1357 | april-oct | dry    | 2.2  | 1.72 | lal et al |
| runoff | runoff   | surface | short | nigeria | non-arid | corn | inorganic | coarse | 1500 | 1357 | april-oct | wet    | 5.79 | 1.94 | lal et al |



| runoff | surface | short | harro wing             | nigeria | non-arid | corn | inorg anic | coars e | 1385 | 1357 | april-oct | normal | 2.26 | 1.17 | lal et al |
|--------|---------|-------|------------------------|---------|----------|------|------------|---------|------|------|-----------|--------|------|------|-----------|
| runoff | surface | short | Disk- ing & harro wing | nigeria | non-arid | corn | inorg anic | coars e | 1217 | 1357 | april-oct | dry    | 2.61 | 1.43 | lal et al |
| runoff | surface | short | Disk- ing & harro wing | nigeria | non-arid | corn | inorg anic | coars e | 1890 | 1357 | april-oct | wet    | 2.12 | 2.04 | lal et al |
| runoff | surface | short | Disk- ing & harro wing | nigeria | non-arid | corn | inorg anic | coars e | 1100 | 1357 | april-oct | dry    | 2.17 | 1.93 | lal et al |
| runoff | surface | short | Disk- ing & harro wing | nigeria | non-arid | corn | inorg anic | coars e | 1500 | 1357 | april-oct | wet    | 1.26 | 2.12 | lal et al |
| runoff | surface | short | Disk- ing & harro wing | nigeria | non-arid | corn | inorg anic | coars e | 1385 | 1357 | april-oct | normal | 1.09 | 0.81 | lal et al |
| runoff | surface | short | Disk- ing & harro wing | nigeria | non-arid | corn | inorg anic | coars e | 1217 | 1357 | april-oct | dry    | 2.41 | 1.94 | lal et al |

| runoff | surface | short | Disk-ing & harrow | nigeria | non-arid | corn | inorganic | coarse | 1890 | 1357 | april-oct | wet    | 2.08 | 1.08 | lal et al |
|--------|---------|-------|-------------------|---------|----------|------|-----------|--------|------|------|-----------|--------|------|------|-----------|
| runoff | surface | short | Disk-ing & harrow | nigeria | non-arid | corn | inorganic | coarse | 1100 | 1357 | april-oct | dry    | 2.69 | 1.87 | lal et al |
| runoff | surface | short | Disk-ing & harrow | nigeria | non-arid | corn | inorganic | coarse | 1500 | 1357 | april-oct | wet    | 1.36 | 1.37 | lal et al |
| runoff | surface | short | Disk-ing & harrow | nigeria | non-arid | corn | inorganic | coarse | 1385 | 1357 | april-oct | normal | 0.92 | 1    | lal et al |
| runoff | surface | short | Disk-ing & harrow | nigeria | non-arid | corn | inorganic | coarse | 1217 | 1357 | april-oct | dry    | 2.48 | 1.87 | lal et al |
| runoff | surface | short | Disk-ing & harrow | nigeria | non-arid | corn | inorganic | coarse | 1890 | 1357 | april-oct | wet    | 1.94 | 2.25 | lal et al |
| runoff | surface | short | Disk-ing & harrow | nigeria | non-arid | corn | inorganic | coarse | 1100 | 1357 | april-oct | dry    | 2.77 | 3.6  | lal et al |
| runoff | surface | short | Disk-ing &        | nigeria | non-arid | corn | inorganic | coarse | 1500 | 1357 | april-oct | wet    | 2.43 | 1.62 | lal et al |

|        |         |       |                                               |         |              |      |               |            |      |      |           |        |      |      |           |
|--------|---------|-------|-----------------------------------------------|---------|--------------|------|---------------|------------|------|------|-----------|--------|------|------|-----------|
| runoff | surface | short | harro wing<br>Disk-<br>ing &<br>harro<br>wing | nigeria | non-<br>arid | corn | inorg<br>anic | coars<br>e | 1385 | 1357 | april-oct | normal | 0.75 | 0.64 | lal et al |
| runoff | surface | short | harro wing<br>Disk-<br>ing &<br>harro<br>wing | nigeria | non-<br>arid | corn | inorg<br>anic | coars<br>e | 1217 | 1357 | april-oct | dry    | 1.71 | 1.41 | lal et al |
| runoff | surface | short | harro wing<br>Disk-<br>ing &<br>harro<br>wing | nigeria | non-<br>arid | corn | inorg<br>anic | coars<br>e | 1890 | 1357 | april-oct | wet    | 2.03 | 1.64 | lal et al |
| runoff | surface | short | harro wing<br>Disk-<br>ing &<br>harro<br>wing | nigeria | non-<br>arid | corn | inorg<br>anic | coars<br>e | 1100 | 1357 | april-oct | dry    | 1.54 | 1.79 | lal et al |
| runoff | surface | short | harro wing<br>Disk-<br>ing &<br>harro<br>wing | nigeria | non-<br>arid | corn | inorg<br>anic | coars<br>e | 1500 | 1357 | april-oct | wet    | 1.47 | 1.47 | lal et al |
| runoff | surface | short | harro wing<br>Disk-<br>ing &<br>harro<br>wing | nigeria | non-<br>arid | corn | inorg<br>anic | coars<br>e | 1385 | 1357 | april-oct | normal | 1.21 | 0.78 | lal et al |

Supplementary Table S3. Calculation from Lajeunesse et al. (2015)

|                      | Leaching concentration (NT) | Runoff concentration (NT) | Leaching concentration (CT) | Runoff concentration (CT) | Leaching load (NT) | Runoff load (NT) | Leaching load (CT) | Runoff load (CT) |
|----------------------|-----------------------------|---------------------------|-----------------------------|---------------------------|--------------------|------------------|--------------------|------------------|
| Overall              | 3.3554                      | 7.8109                    | 4.3752                      | 7.3838                    | 14.8939            | 5.1686           | 13.9851            | 5.1240           |
| Dryland              | 7.9584                      | 4.7375                    | 6.9478                      | 4.3698                    | 6.1349             | 4.7877           | 5.9063             | 3.2637           |
| Non-dryland          | 9.9089                      | 6.9073                    | 14.9312                     | 6.5125                    | 13.6626            | 4.2558           | 13.1217            | 4.1229           |
| Fine-texture         | 5.2177                      | 4.3224                    | 4.9033                      | 4.9260                    | 3.8265             | 4.9315           | 3.4651             | 3.2555           |
| Medium-texture       | 16.2959                     | 10.8680                   | 15.7066                     | 10.7055                   | 13.3590            | 4.069            | 12.601             | 3.7432           |
| Coarse-texture       | 5.2732                      | 12.0465                   | 6.1438                      | 13.5507                   | 7.8461             | 1.7408           | 8.3248             | 4.8334           |
| Dry year             | 5.1547                      | 3.6666                    | 8.9040                      | 4.4737                    | 5.7357             | 3.1980           | 4.7717             | 3.6915           |
| Normal year          | 14.6570                     | 3.8510                    | 8.7038                      | 3.0337                    | 8.1166             | 3.6301           | 7.9079             | 3.6770           |
| Wet year             | 11.8913                     | 7.4063                    | 10.0960                     | 6.8638                    | 11.7409            | 3.0227           | 14.1006            | 2.6239           |
| Corn                 | 14.6344                     | 7.8448                    | 13.9262                     | 7.1899                    | 11.9455            | 4.1995           | 11.4617            | 3.8541           |
| Soybean              | 14.0854                     | 7.6098                    | 12.4351                     | 5.4871                    | 12.1825            | 6.3758           | 8.1807             | 5.3787           |
| Wheat                | 6.9547                      | 2.3982                    | 5.7786                      | 1.9263                    | 4.4604             | 2.5894           | 4.2436             | 1.4756           |
| Short duration       | 10.2574                     | 5.3996                    | 10.5340                     | 5.1060                    | 8.4454             | 4.1585           | 7.1300             | 3.7839           |
| Medium duration      | 8.1510                      | 7.0773                    | 6.3635                      | 6.3766                    | 5.0581             | 2.4277           | 4.3341             | 2.6628           |
| Long duration        | 15.9081                     | 3.8030                    | 12.0155                     | 1.9139                    | 11.2084            | 3.4592           | 11.6498            | 3.5524           |
| Organic fertilizer   | 6.3817                      | 3.9645                    | 6.6270                      | 4.3370                    | 7.5498             | 1.3635           | 7.8148             | 1.9680           |
| No fertilizer        | 7.2176                      | 2.6266                    | 6.3699                      | 2.9311                    | 6.5340             | 6.1615           | 5.2331             | 4.6215           |
| Inorganic fertilizer | 18.0824                     | 6.2754                    | 15.5303                     | 5.6247                    | 12.2449            | 4.6689           | 11.5314            | 4.0724           |
